# Supplementary material for: Biomechanical stimulation promotes blood vessel growth despite VEGFR-2 inhibition
Source: PubMed Central journal article supplement (PMC10712065; doi:10.1186/s12915-023-01792-y), 2023-12-10
Supplement: 12915_2023_1792_MOESM1_ESM.pdf [file 12915_2023_1792_MOESM1_ESM.pdf]

1a

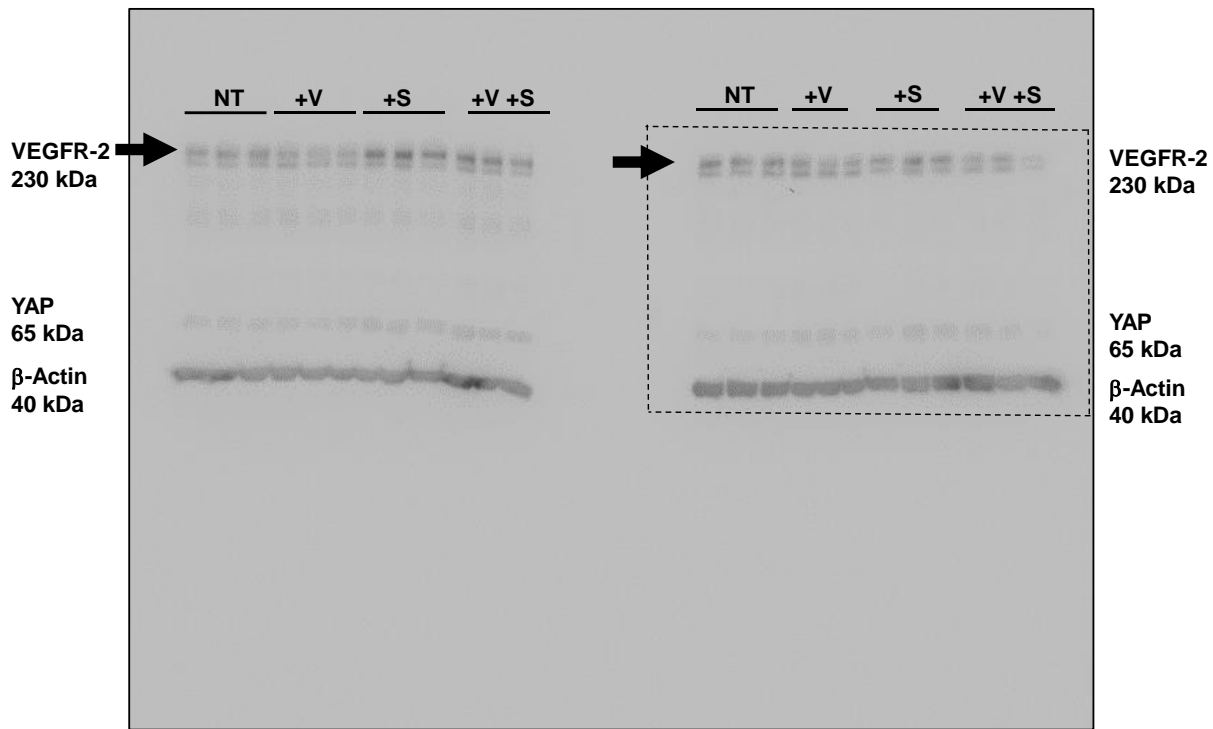

1b

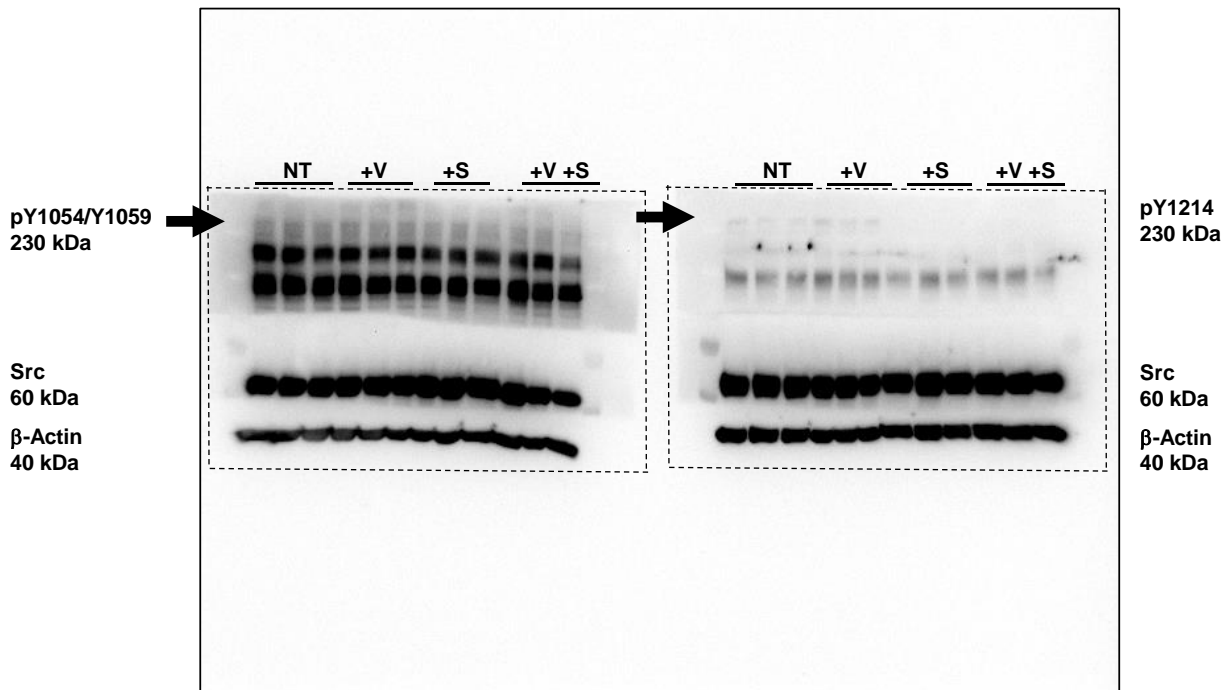

1c

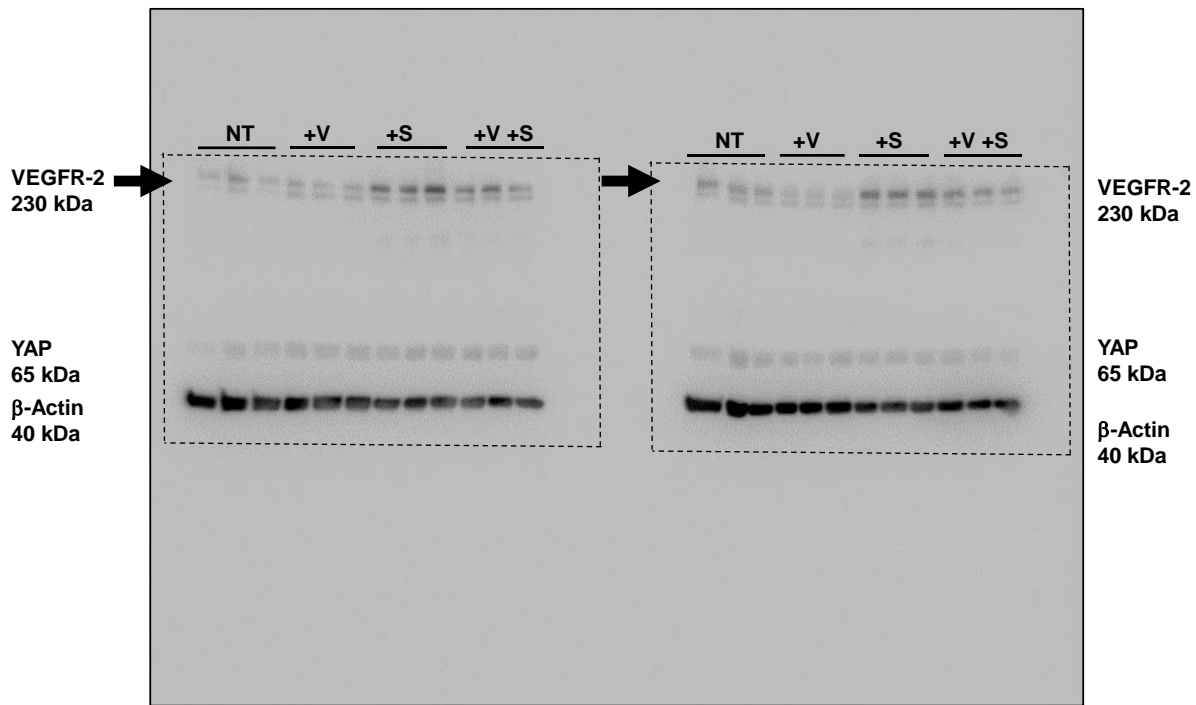

1d

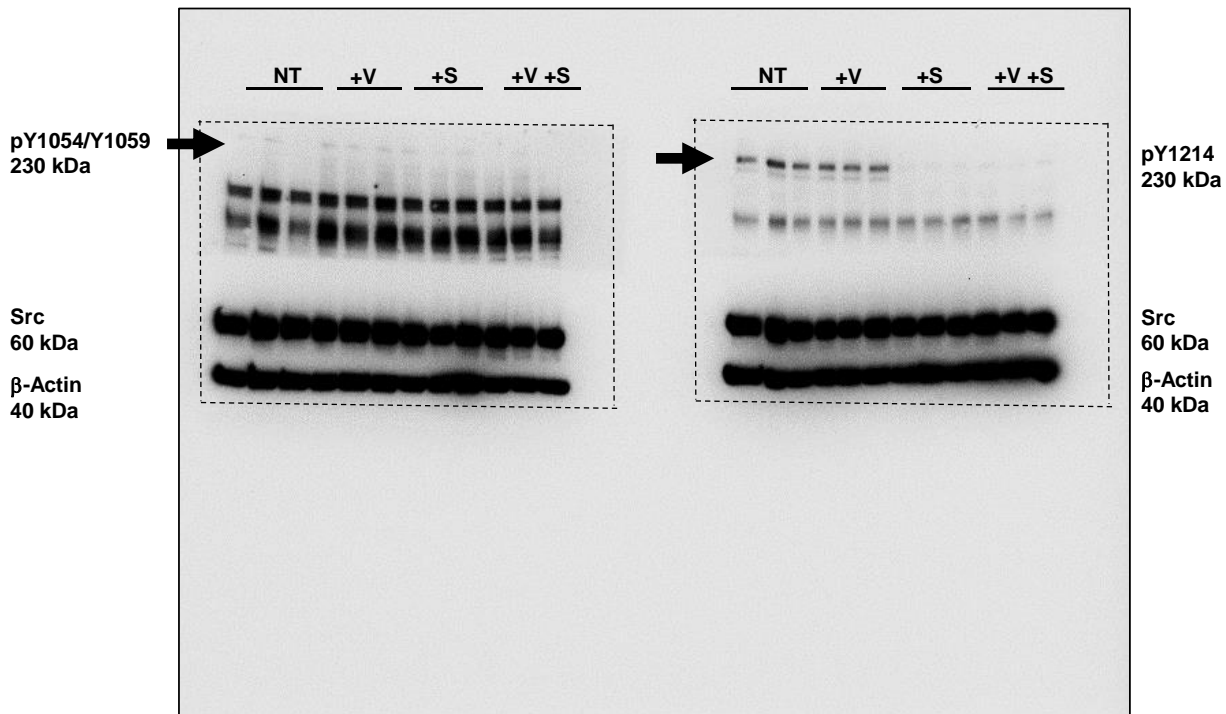

**Supplemental Fig. 1 – Labelled Western Blots for Data in Fig. 1.** This figure matches Fig. 1 in the main text. **(a)** HMECs were either given no treatment (NT), exogenous VEGF (+V), SU5416 (+S), or both exogenous VEGF and SU5416 (+V +S). Blots were stained for total VEGFR-2, **(b)** pY1054/Y1059, and pY1214. **(c-d)** HUVECs received the same treatments and stains. All blots were

also stained for YAP or Src and  $\beta$ -actin as a loading control. Arrows indicate VEGFR-2 bands quantified.

2a

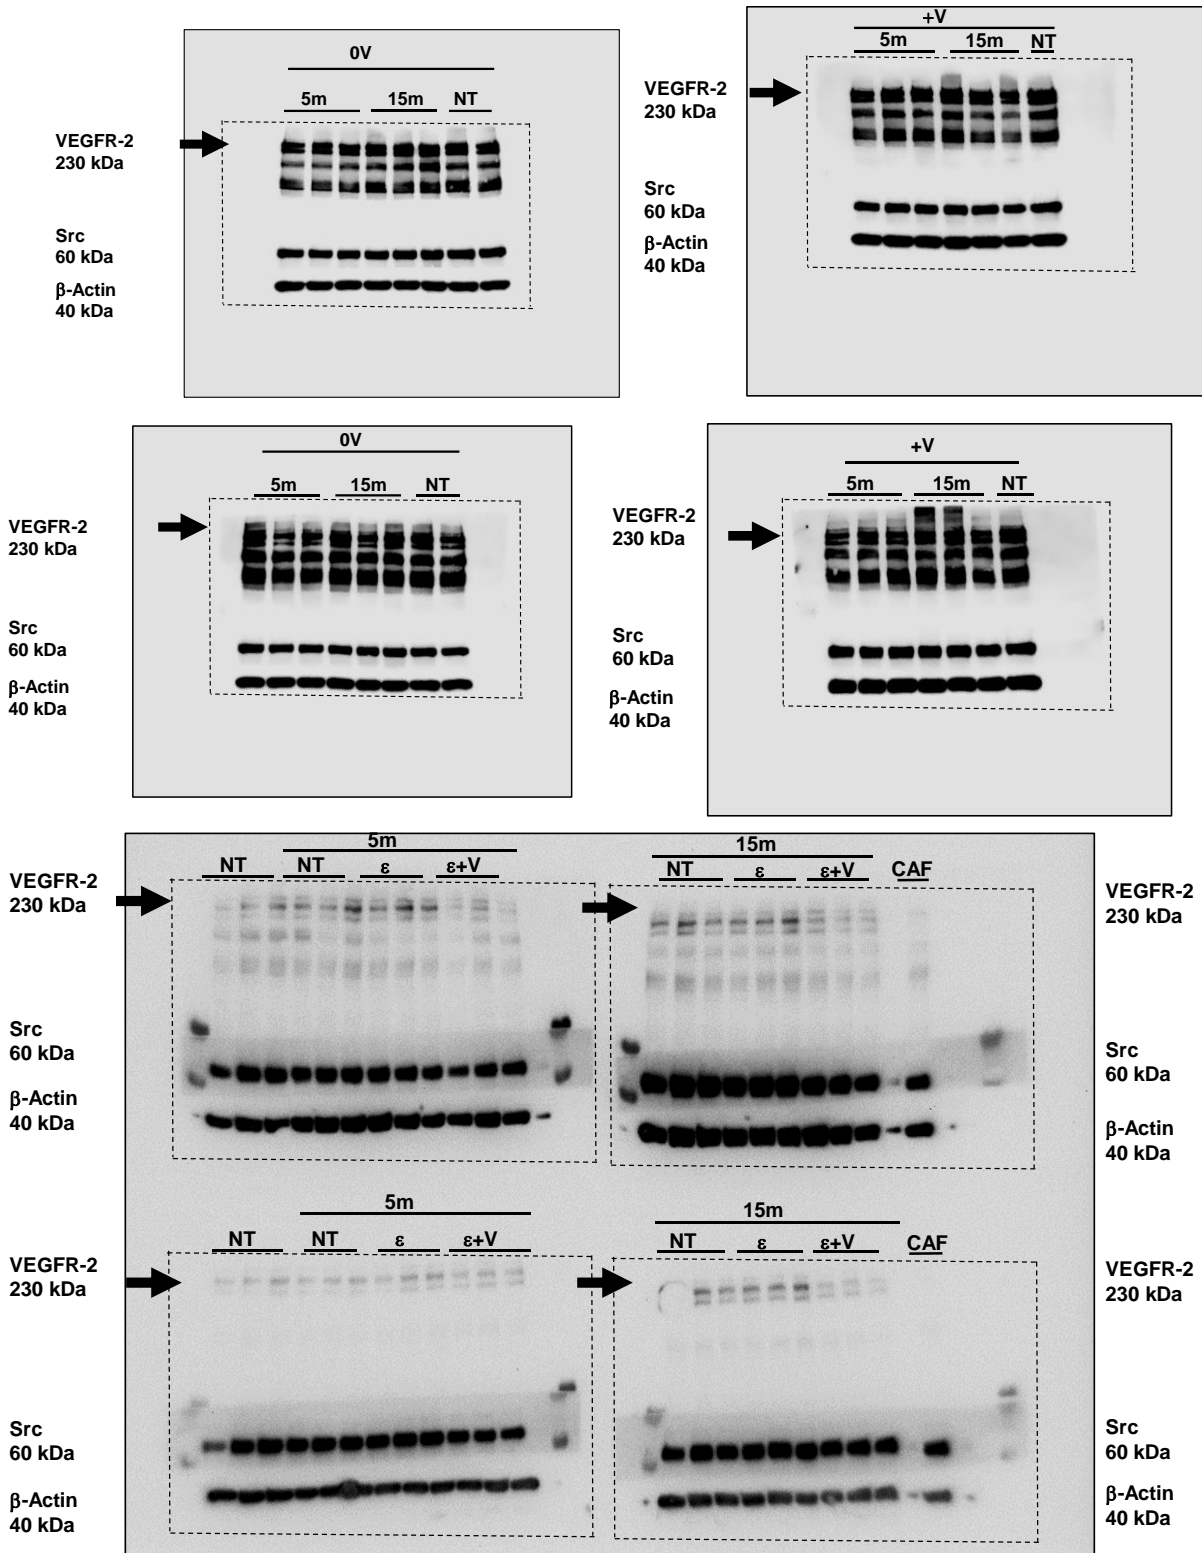

2b

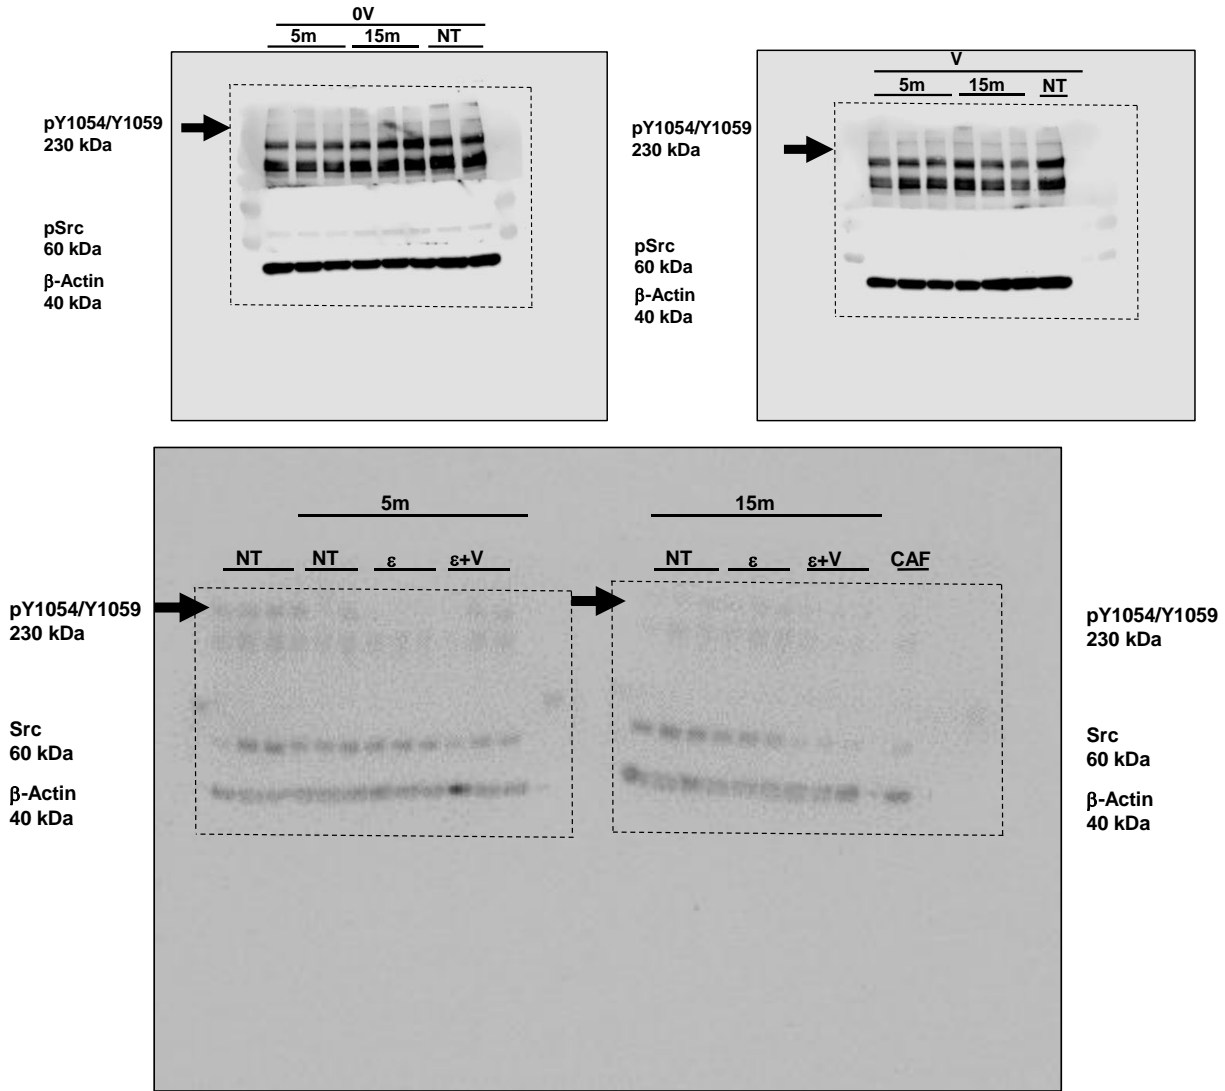

2c

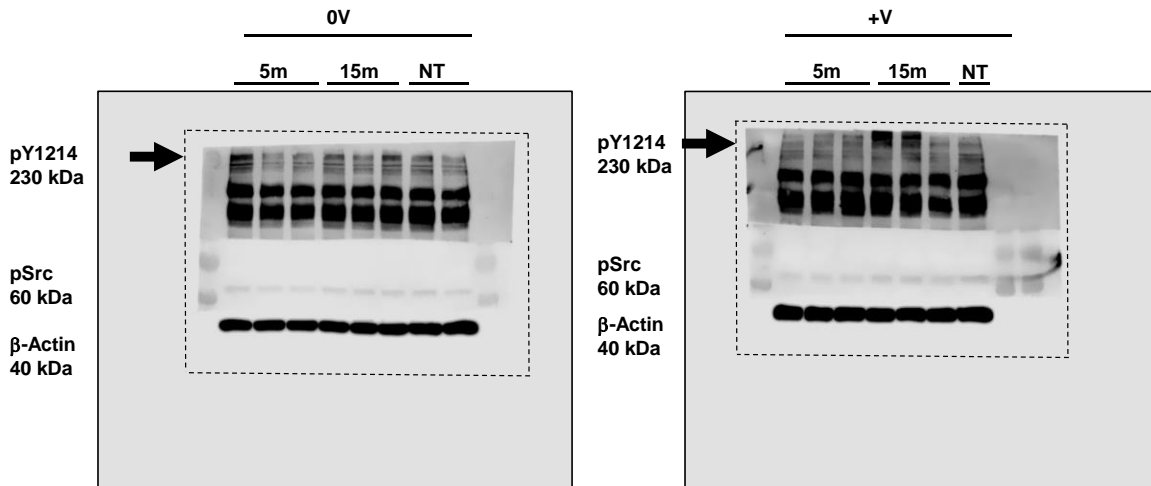

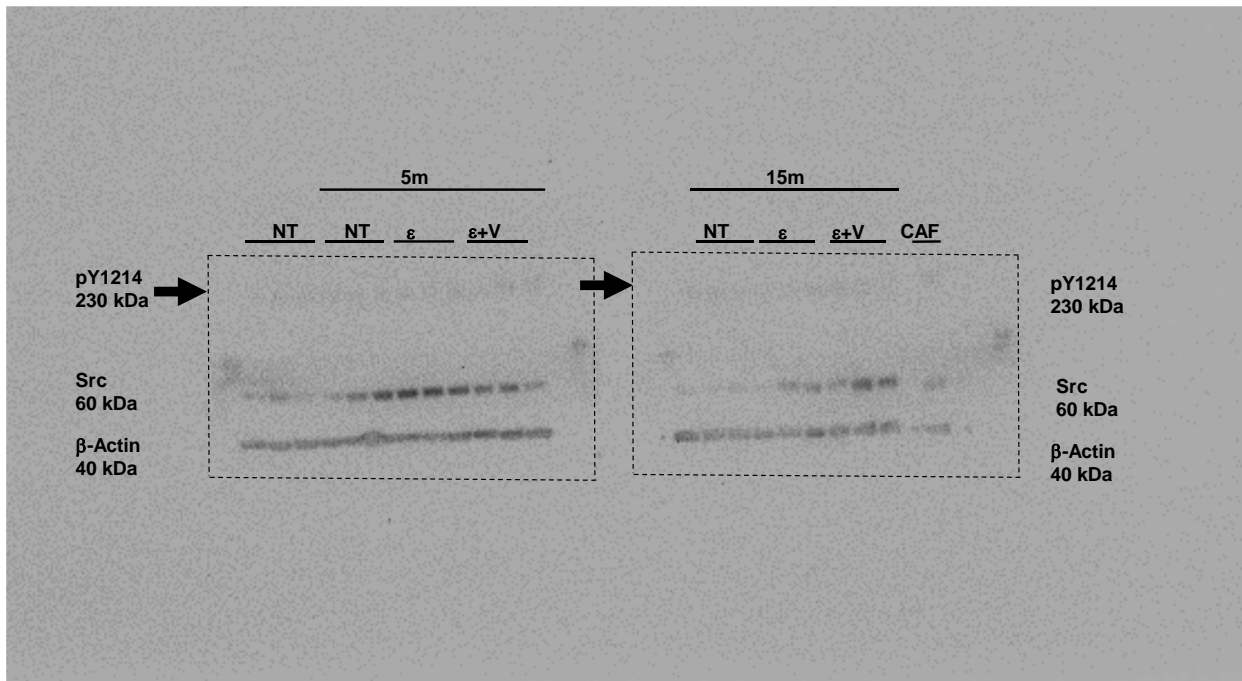

## 2d

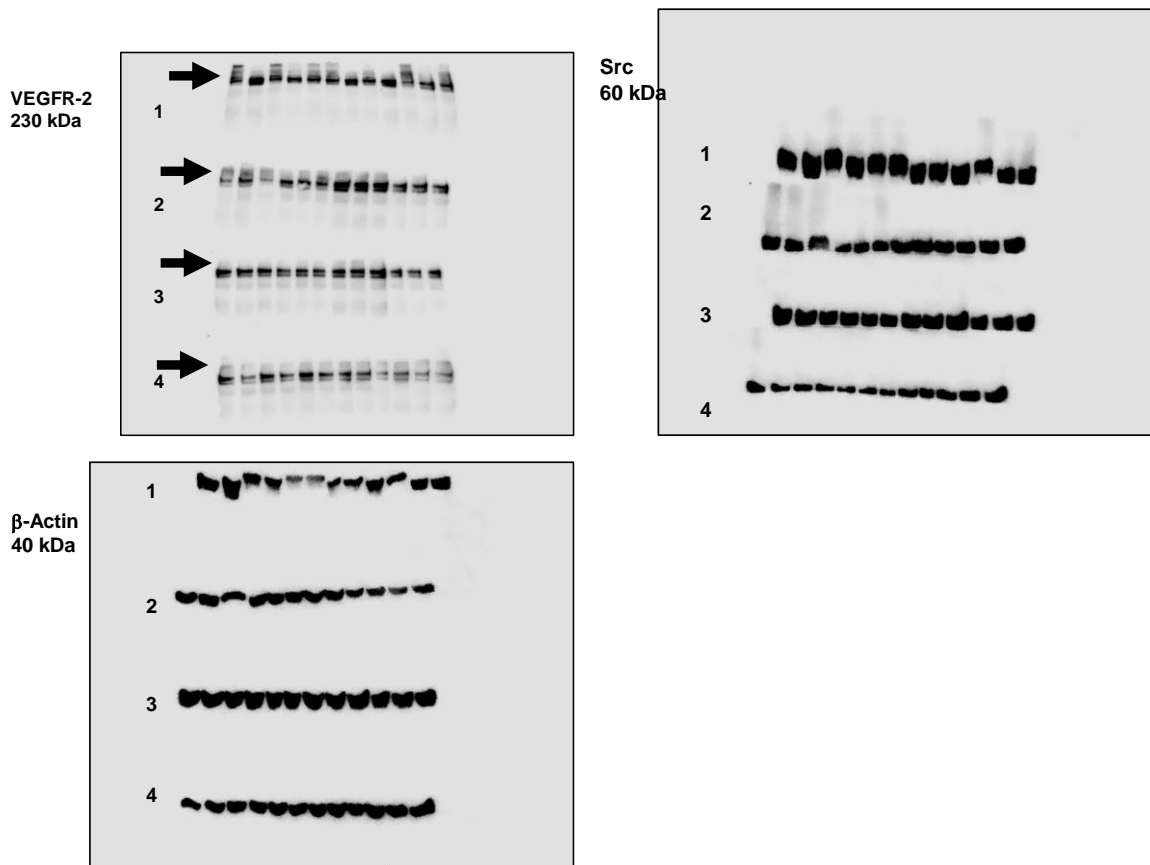

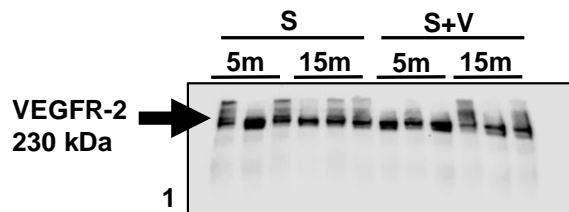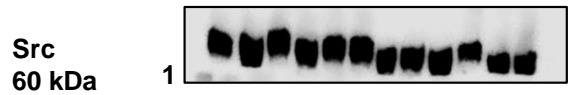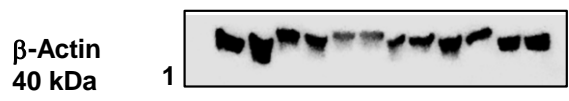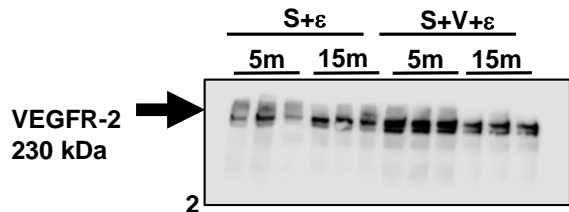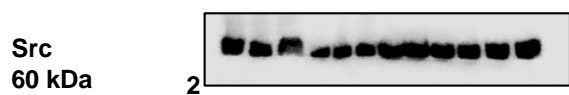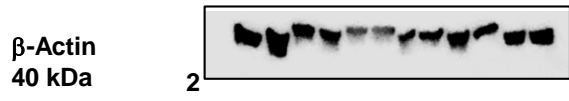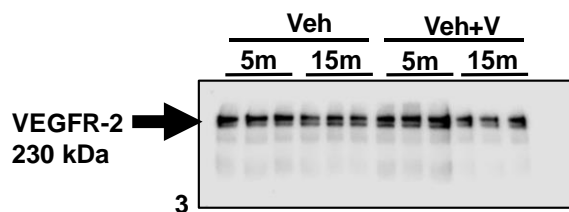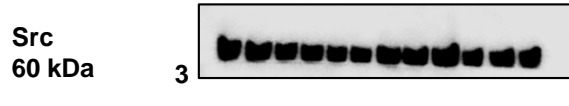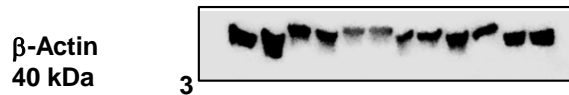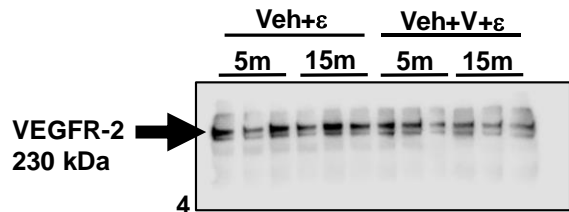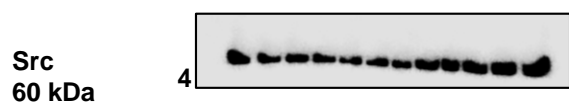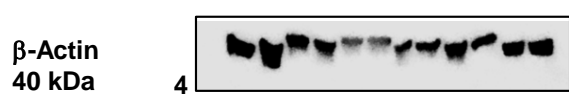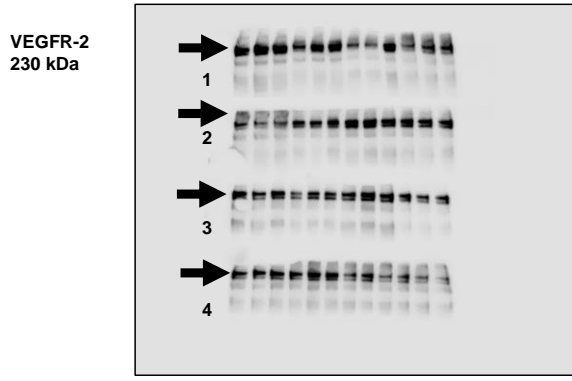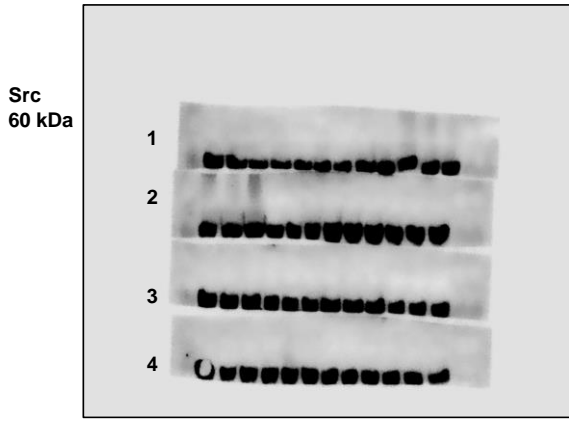

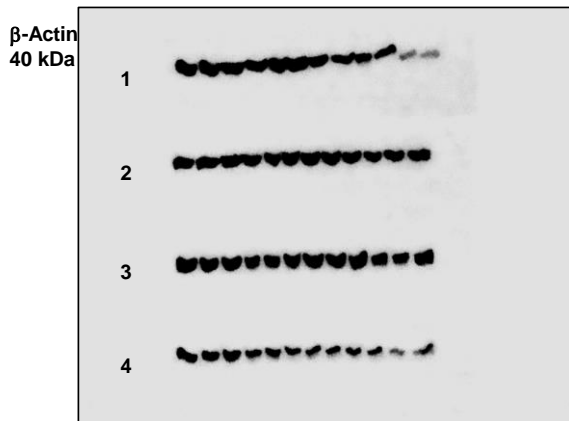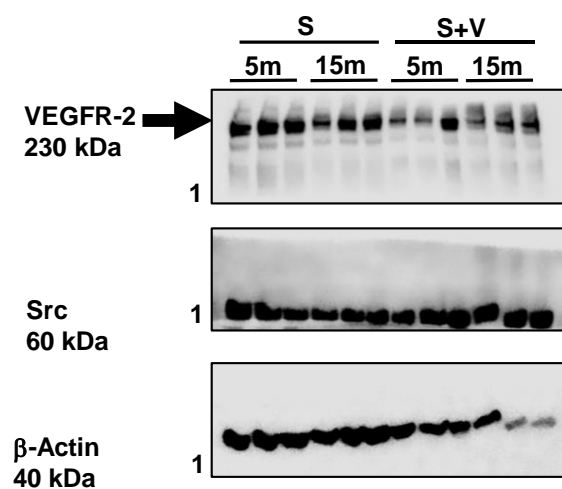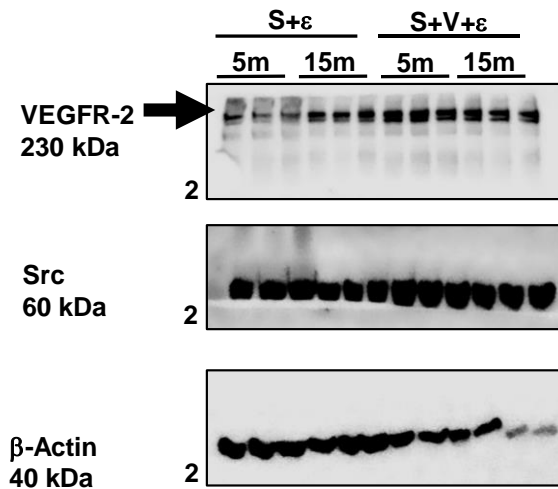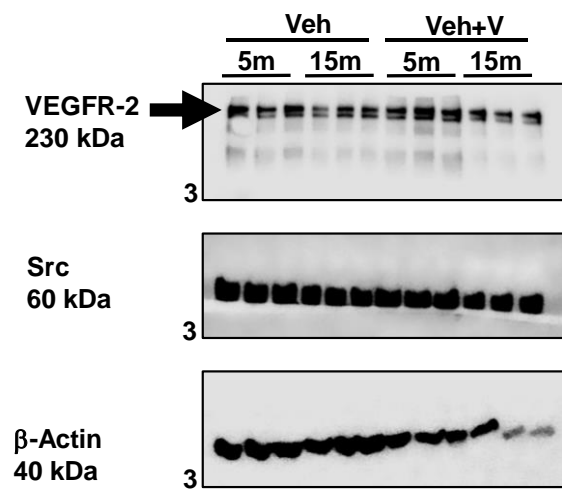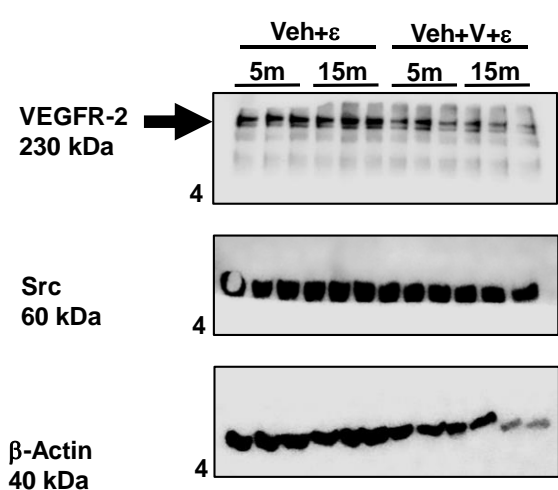



2e

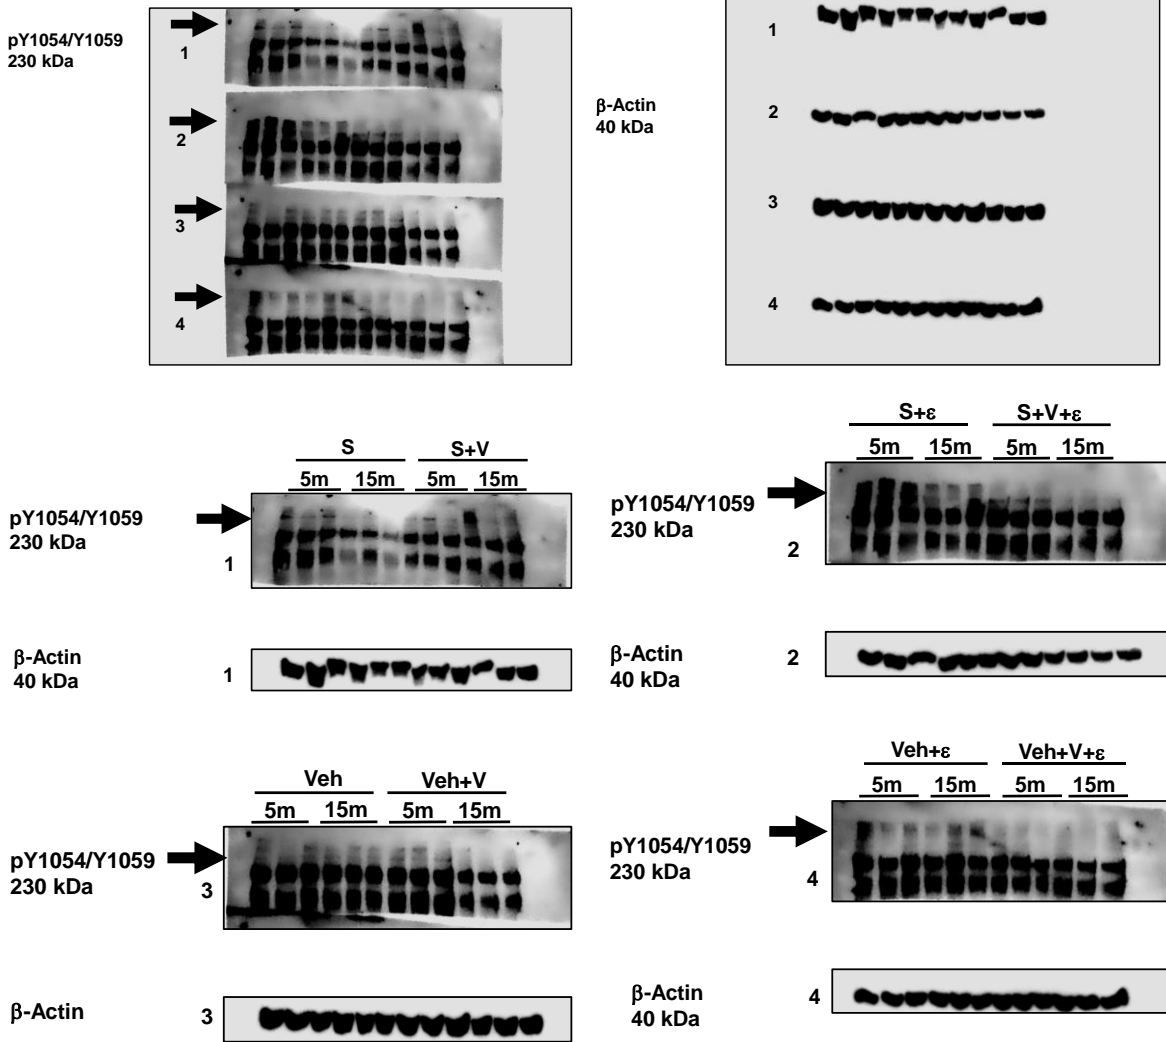

2f

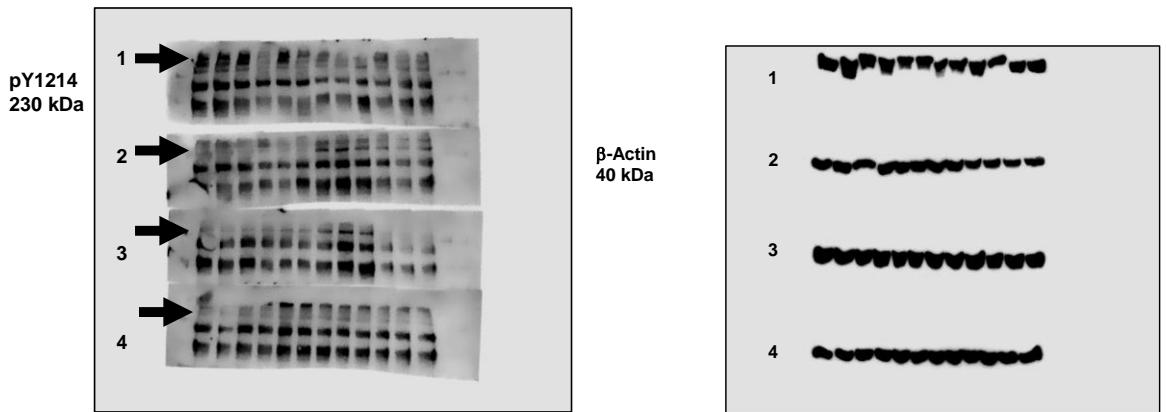

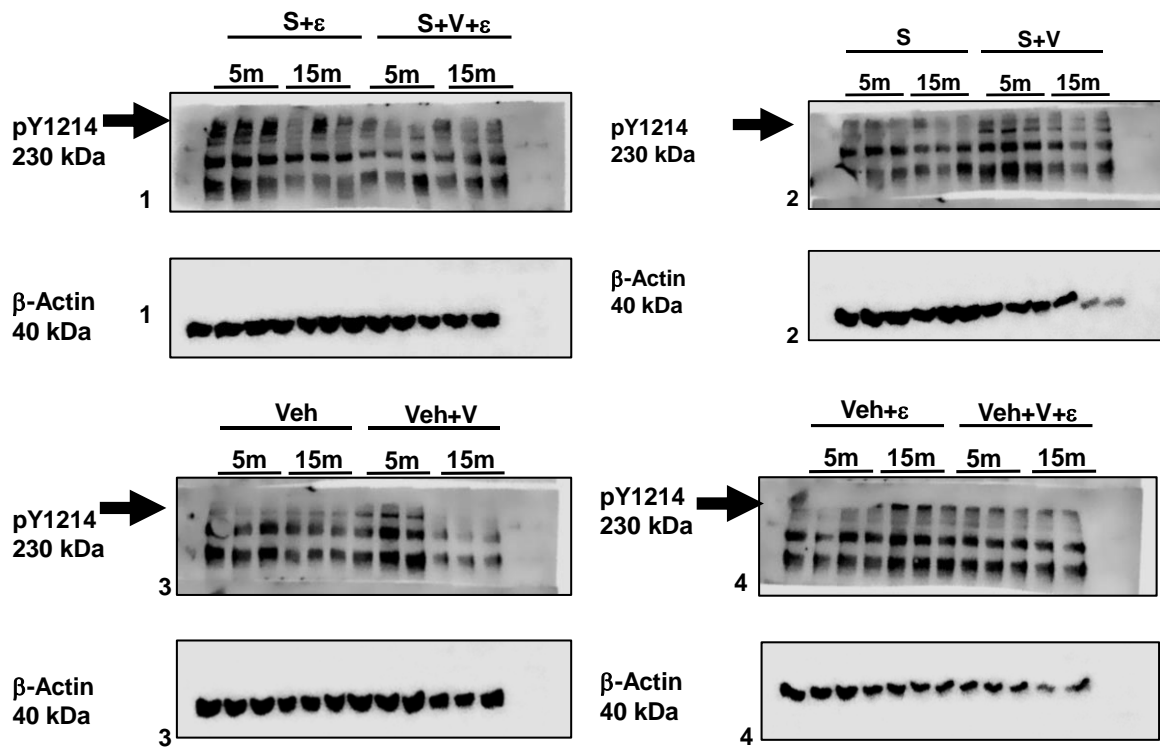

2g

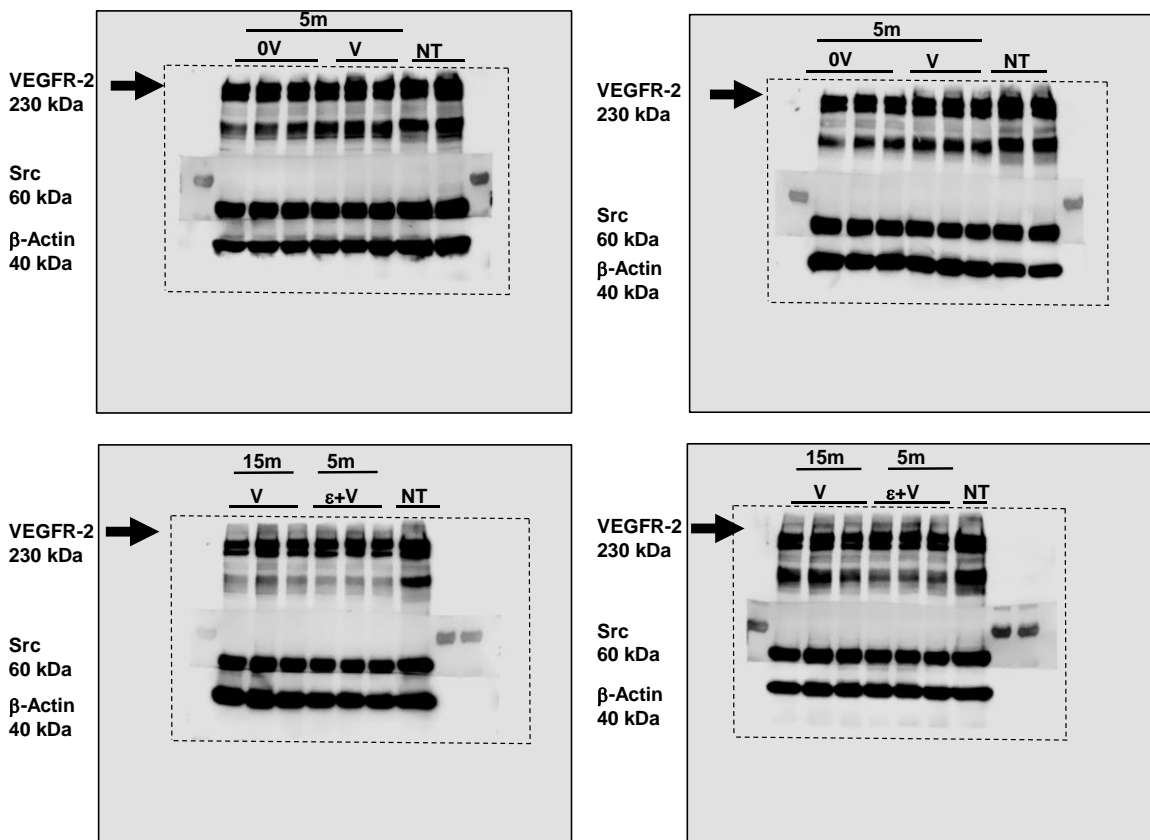

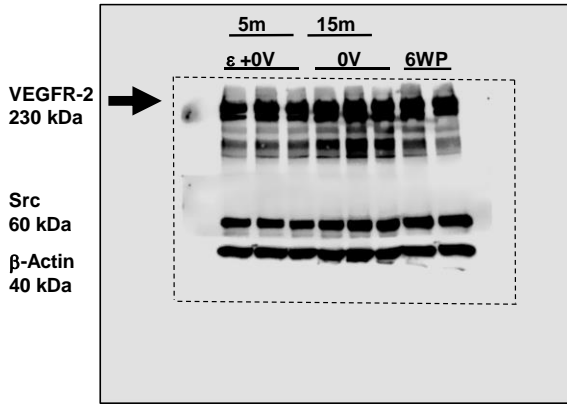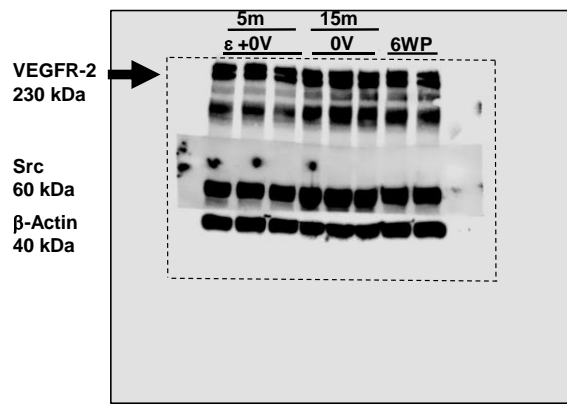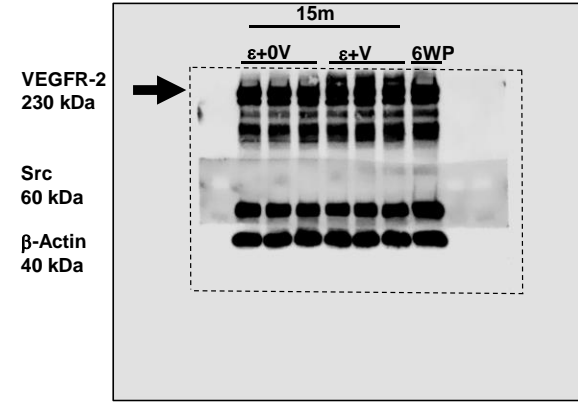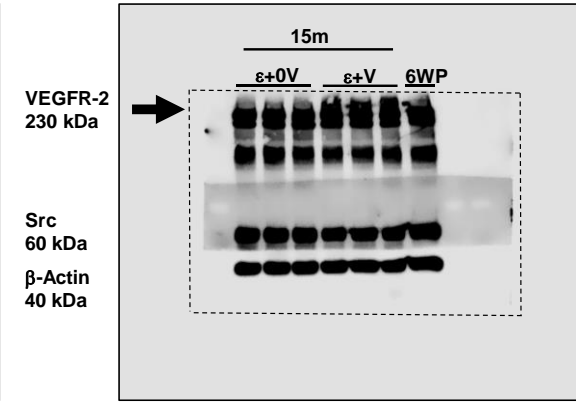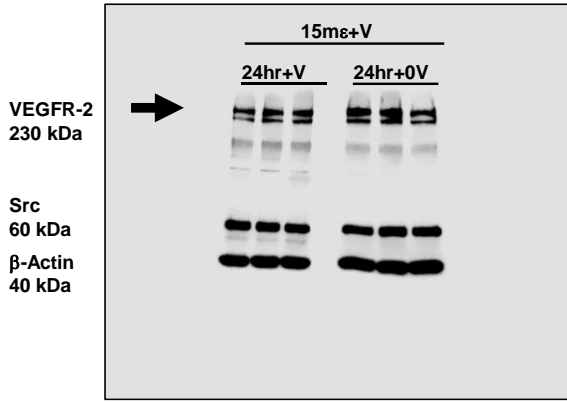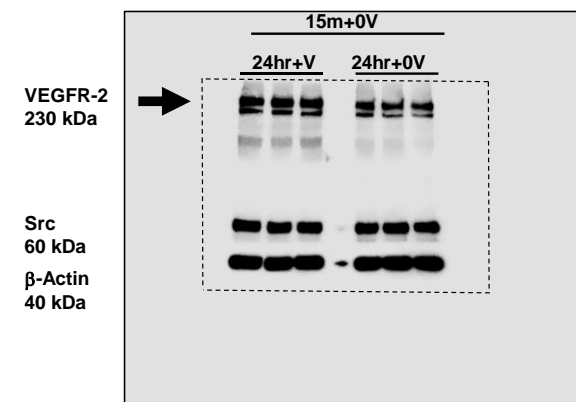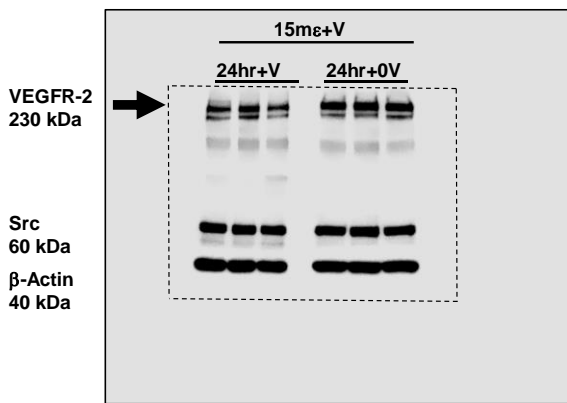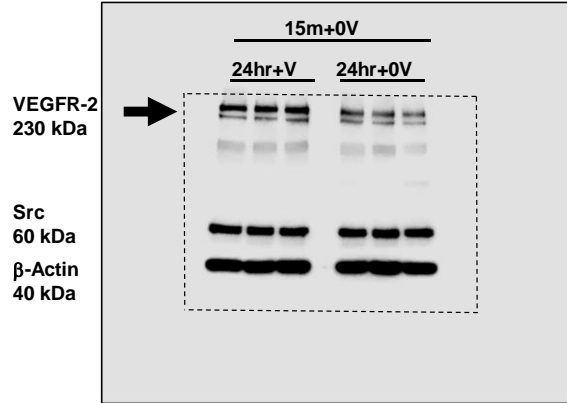

2h

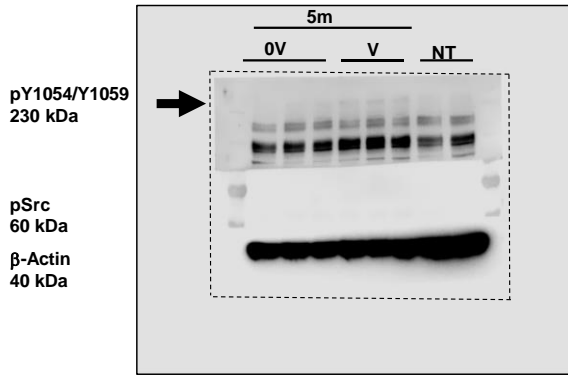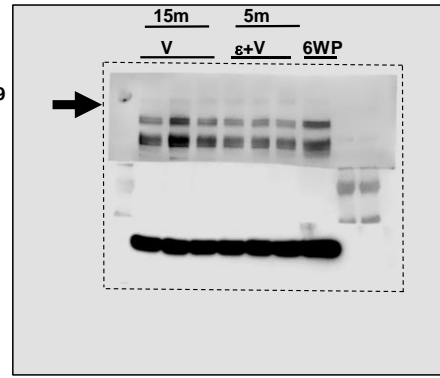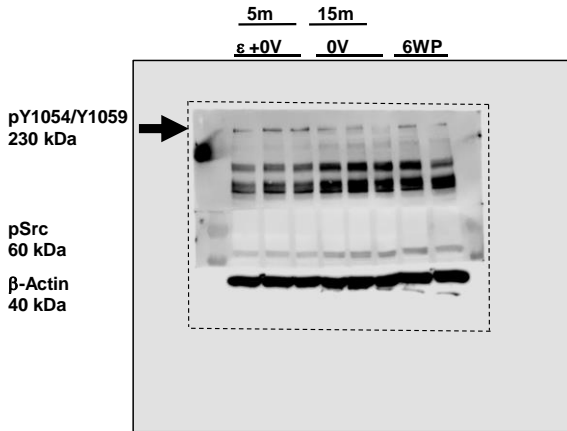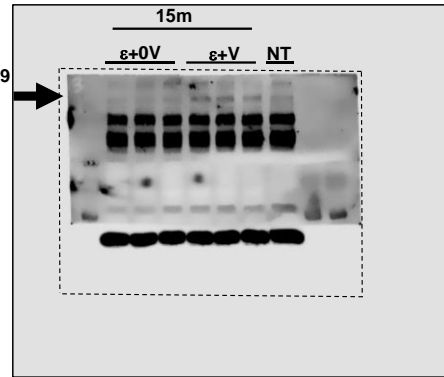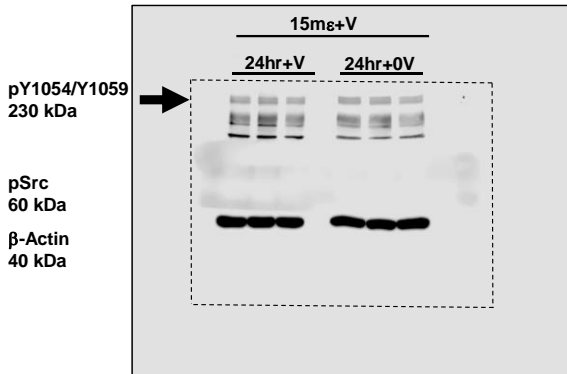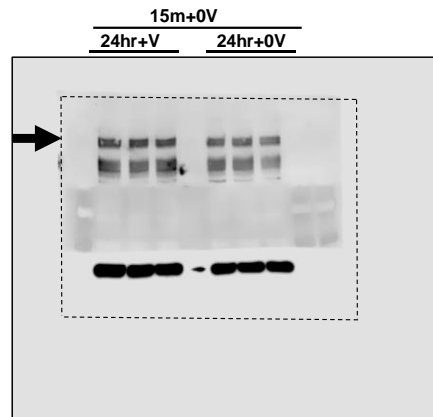

2i

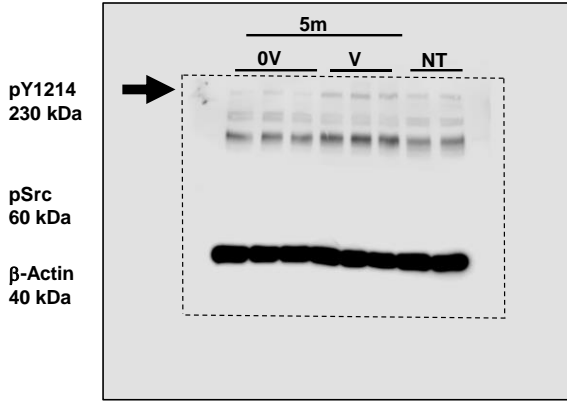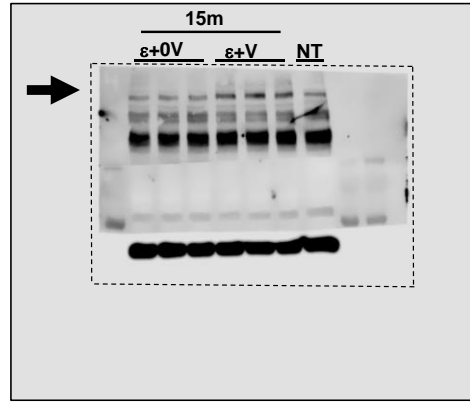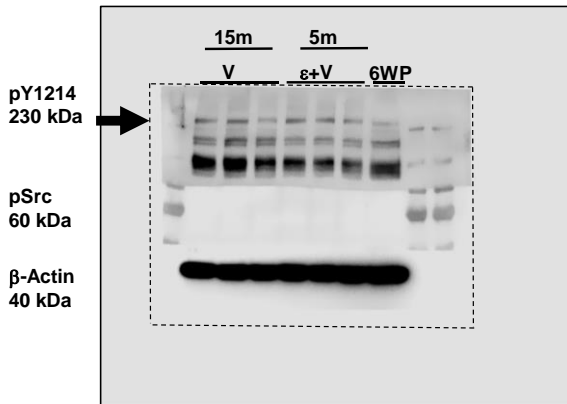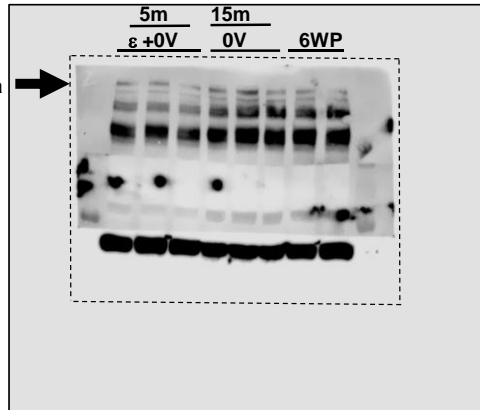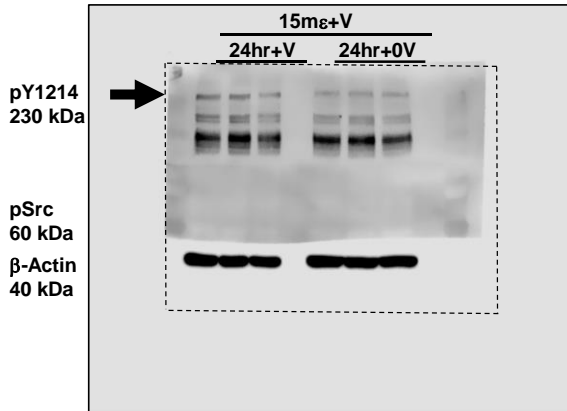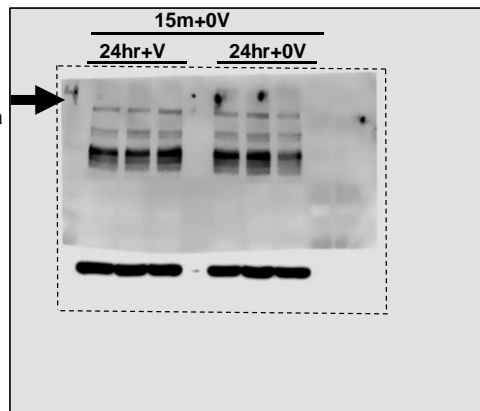

2j

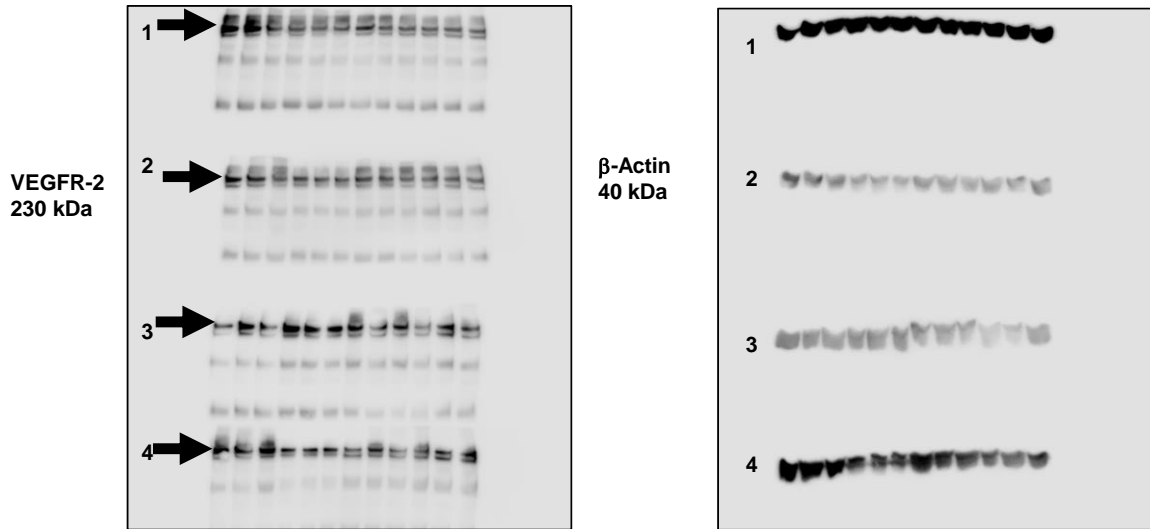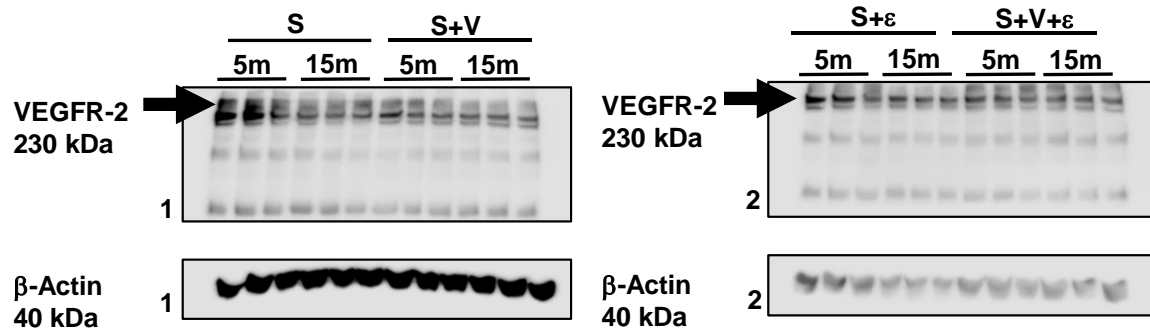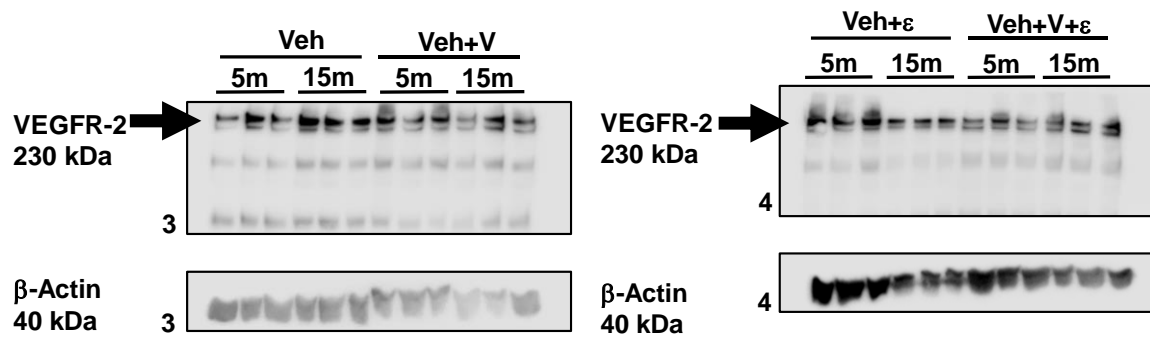

VEGFR-2  
230 kDa

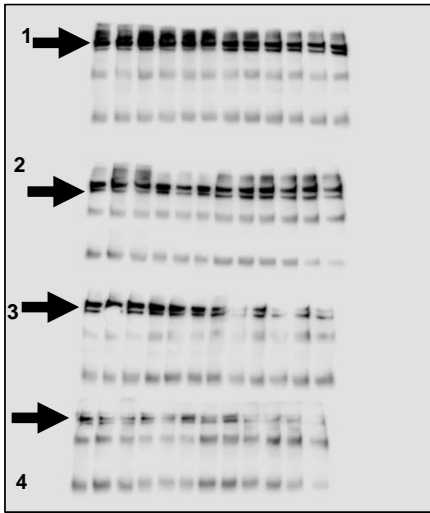

$\beta$ -Actin  
40 kDa

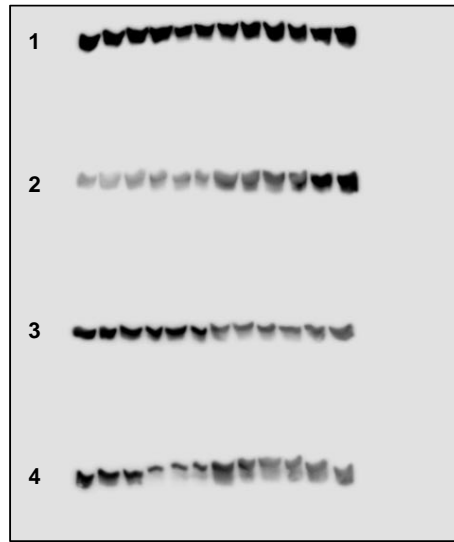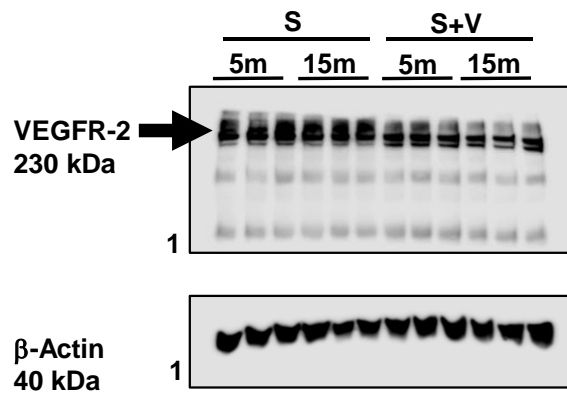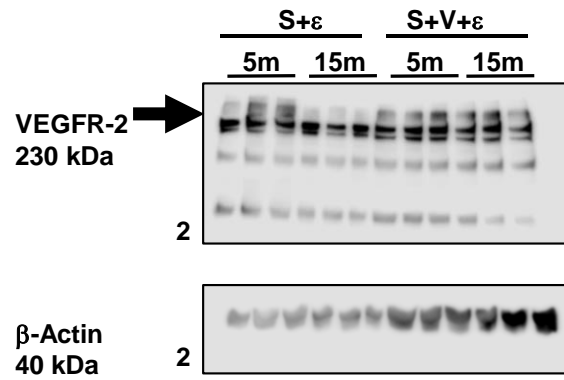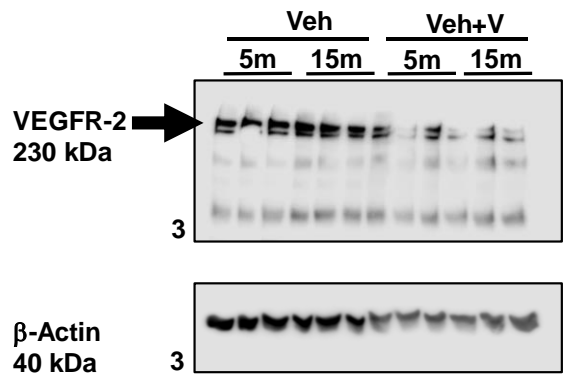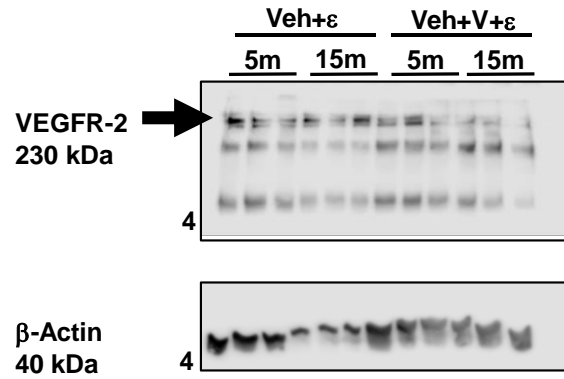

2k

pY1054/Y1059  
160 kDa

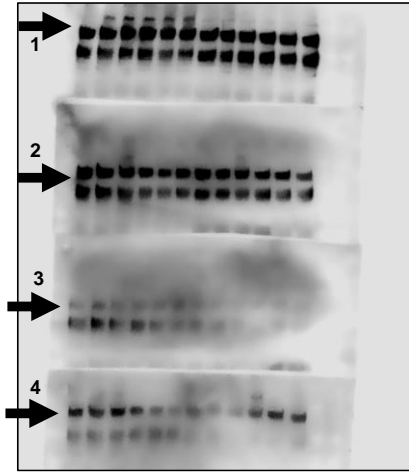

$\beta$ -Actin  
40 kDa

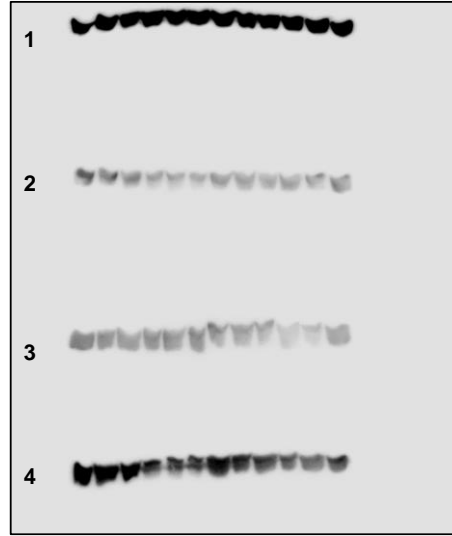

pY1054/Y1059  
160 kDa

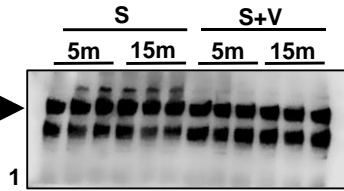

$\beta$ -Actin  
40 kDa

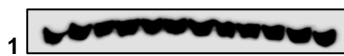

pY1054/Y1059  
160 kDa

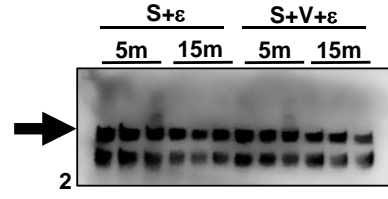

$\beta$ -Actin  
40 kDa

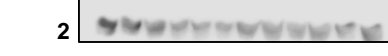

pY1054/Y1059  
160 kDa

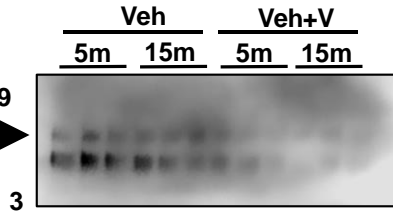

$\beta$ -Actin  
40 kDa

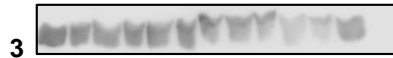

pY1054/Y1059  
160 kDa

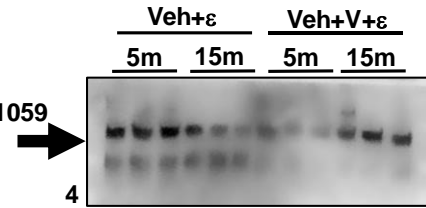

$\beta$ -Actin  
40 kDa

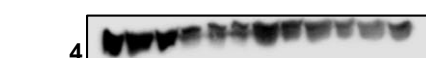



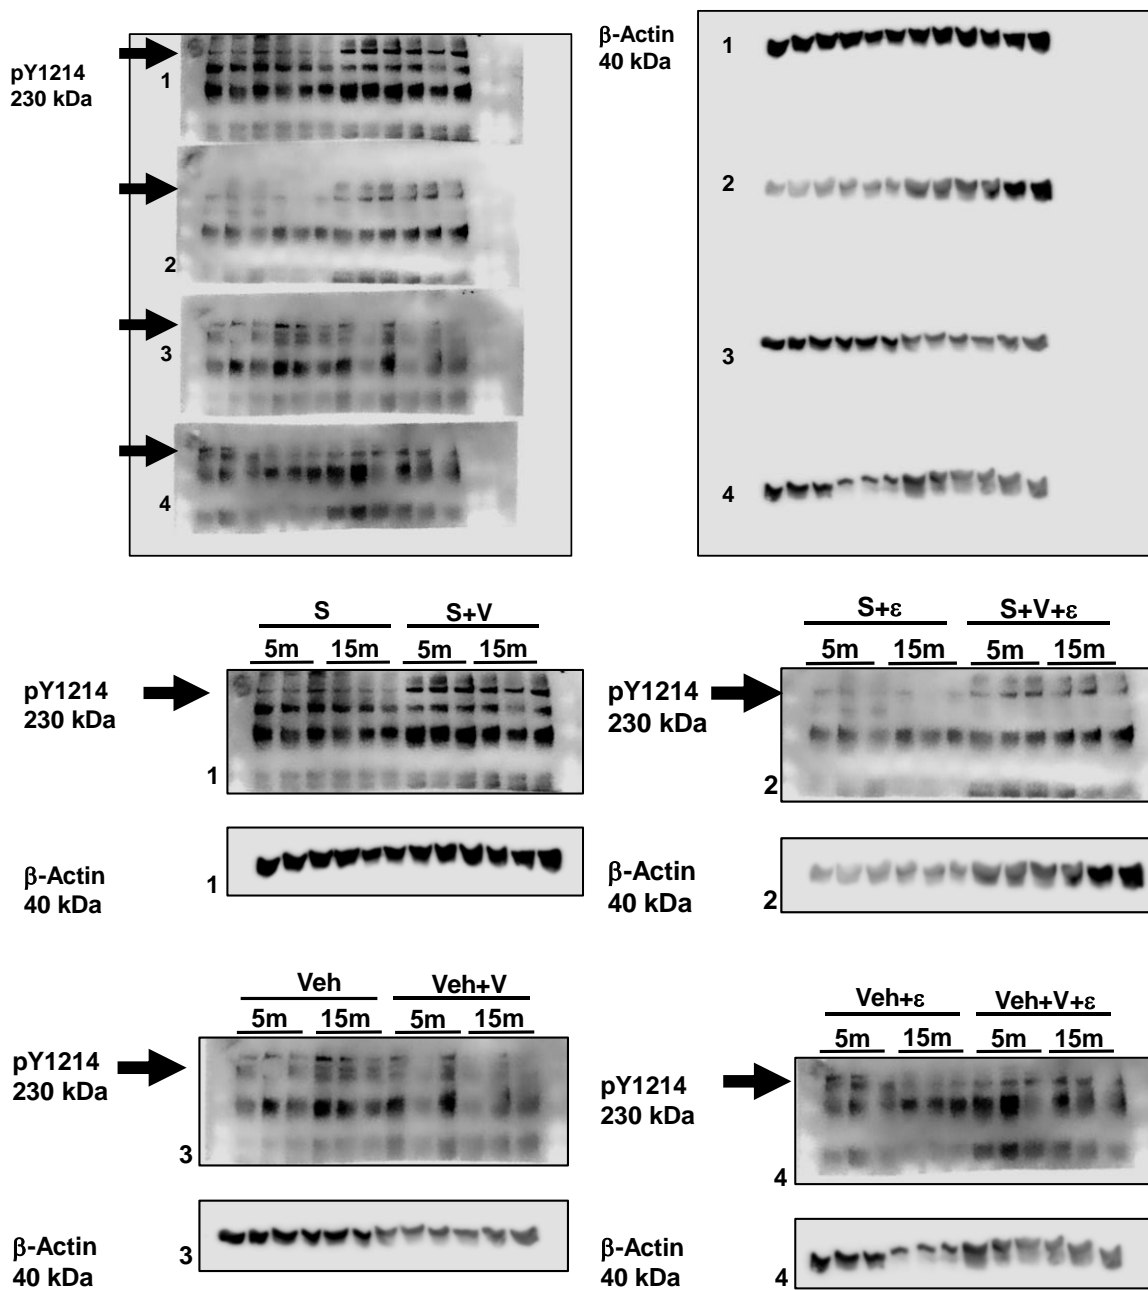

**Supplemental Fig. 2 – Labeled Western Blots for Data in Fig. 2.** This figure matches Fig. 2 in the main text. **(a)** HMECs were subjected to control (NT) conditions without strain and VEGF, VEGF only (25ng/mL, V), strain only ( $\epsilon$ ), or strain plus VEGF ( $\epsilon + V$ ) for 5min or 15min. Western blots were performed to analyze total VEGFR-2, **(b)** pY1054/Y1059, or **(c)** pY1214 levels relative to the 0min, NT control groups. **(d)** HMECs were treated with combinations of strain, VEGF, SU5416, and a vehicle control then stained for total VEGFR-2, **(e)** pY1054/Y1059, and **(f)** pY1214. Some blots were treated with 24hr regular EGM-2 or 0ng/ml VEGF EGM-2 before final treatment to ensure this did not alter results. **(g-l)** HUVECs received the same treatments and stains. All blots were also stained for  $\beta$ -actin as a loading control. Arrows indicated VEGFR-2 bands quantified. Full images are numbered and correspond to labelled pictures.

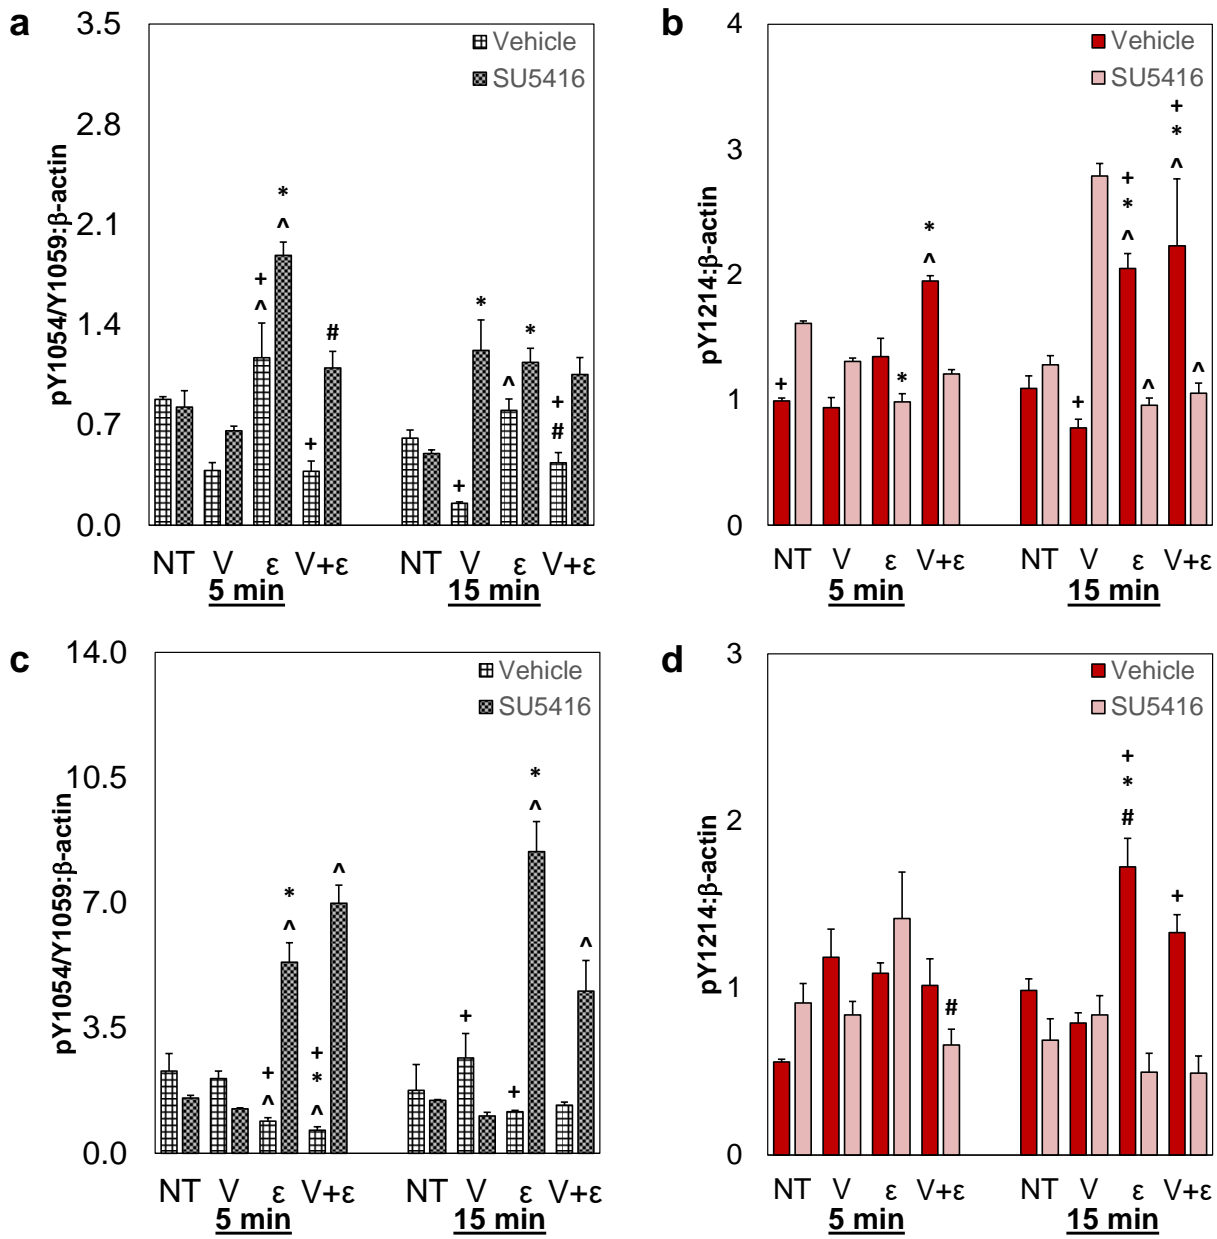

3

**Supplemental Fig. 3 – Quantification of pY1054/Y1059 and pY1214 Contrasting Data in Fig. 2e,f,k,l.** This data is normalized to β-actin as opposed to total VEGFR-2. **(a)** HMECs were treated with combinations of strain, VEGF (25ng/ml), SU5416 (3μM), and a vehicle control then stained for pY1054/Y1059 and **(b)** pY1214. **(c-d)** Quantification of Western blots for phosphorylated VEGFR-2 in HUVECs with same treatment groups outlined above. Western blot quantifications were normalized to β-actin. pY1054/Y1059 was quantified for the 160kDa cleavage product due to partial absence of the mature product in the blot for part c. For all studies, N = 3 with averages + SEM shown. + p < 0.05 versus SU5416 with same treatment, \* p < 0.05 compared to NT at same time point, ^ p < 0.05 versus V at same time point, # p < 0.05 compared to ε at same time point. Groups b and c were compared with Kruskal-Wallis test, followed by post-hoc Dunn's tests. Groups a and d were compared with ANOVA, followed by post-hoc Tukey HSD tests.

**4a**

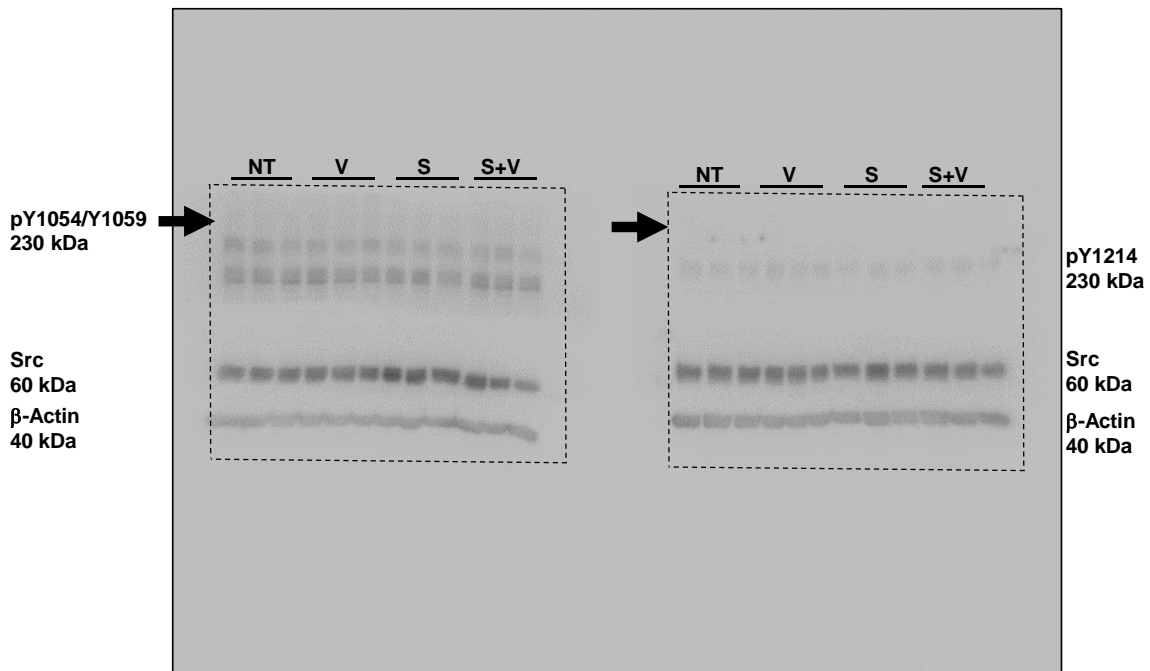

**4b**

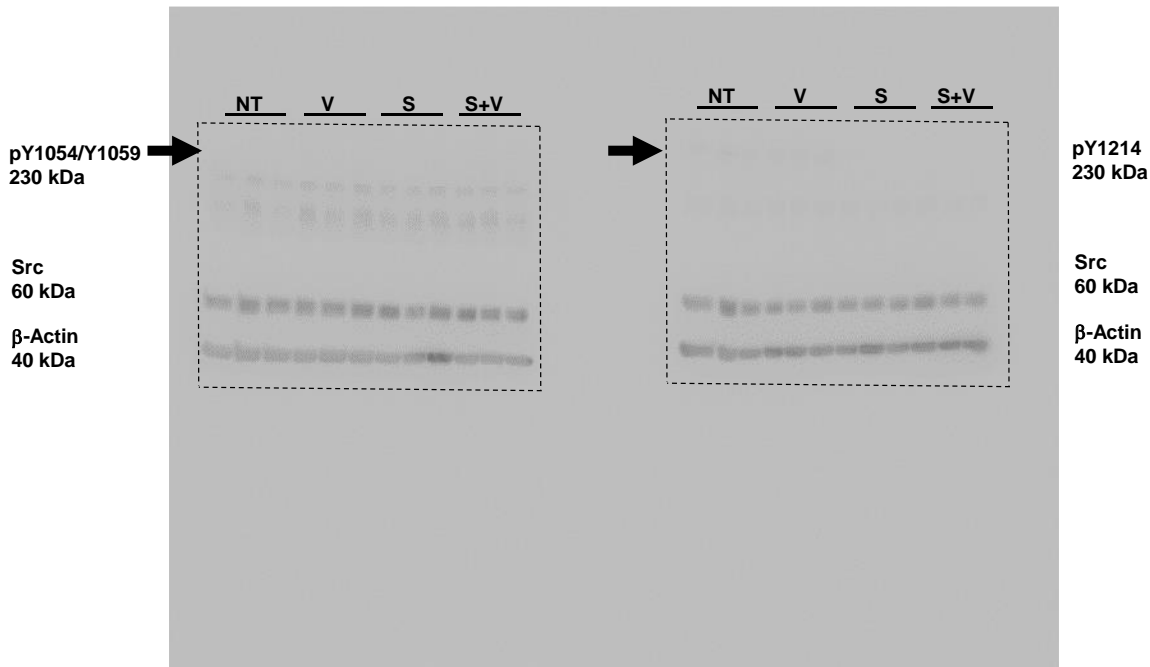

**4c**

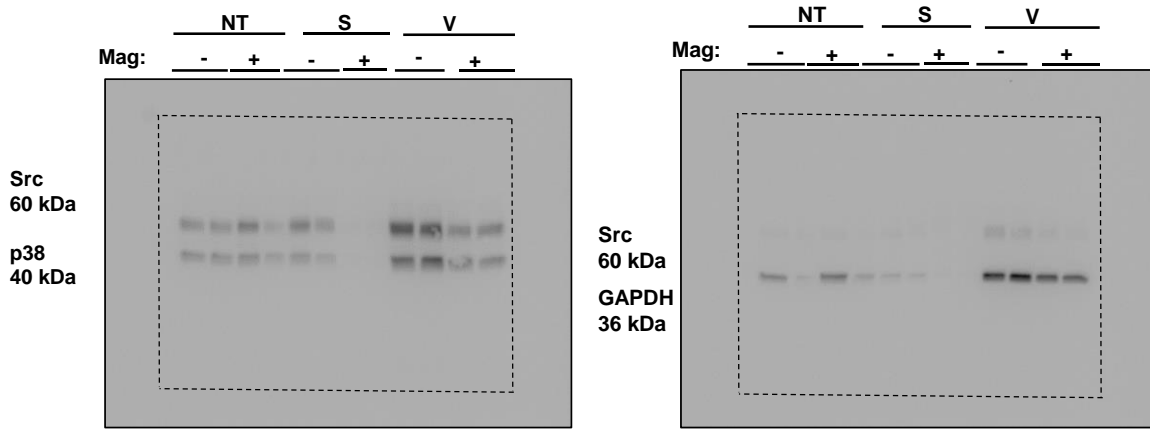

#### 4d

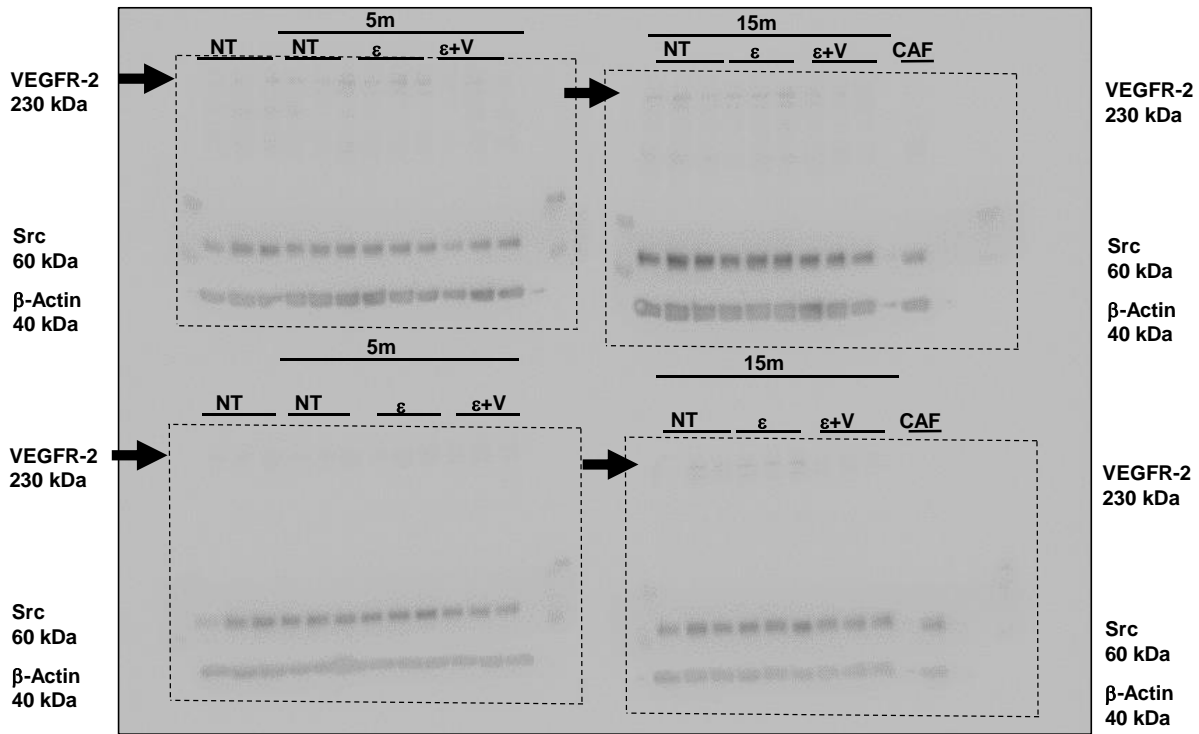

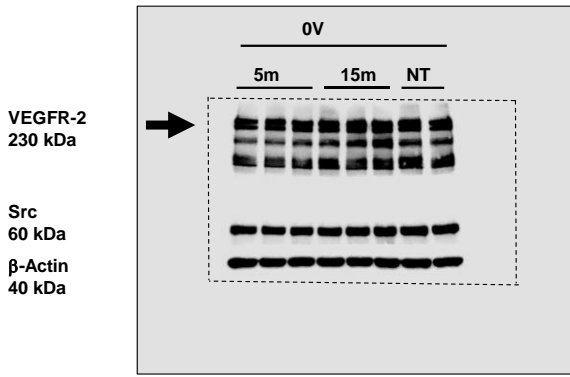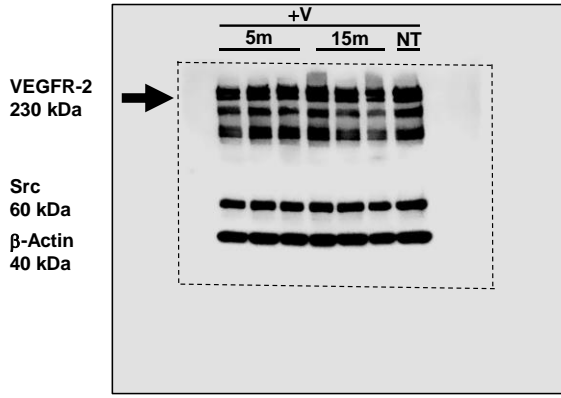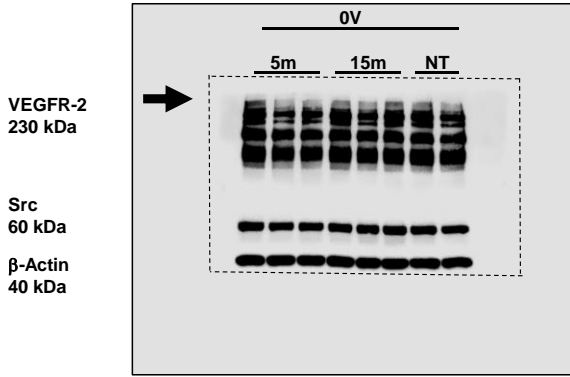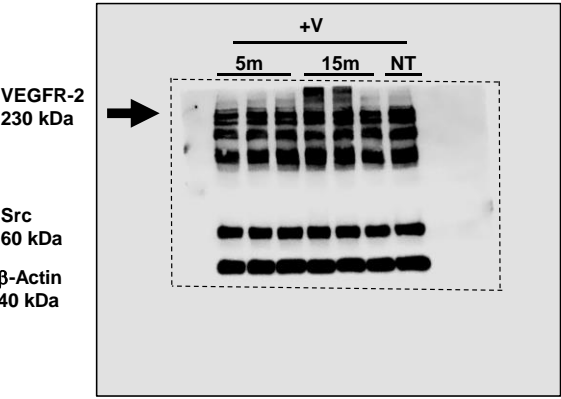

4e

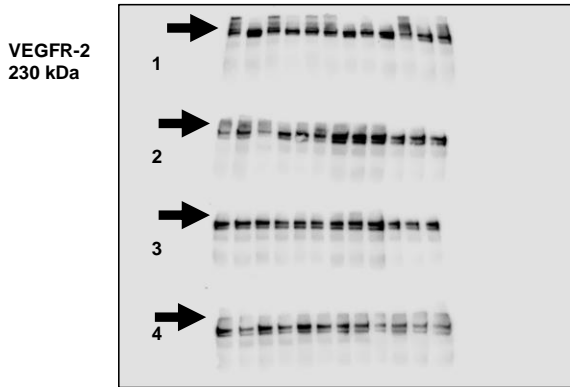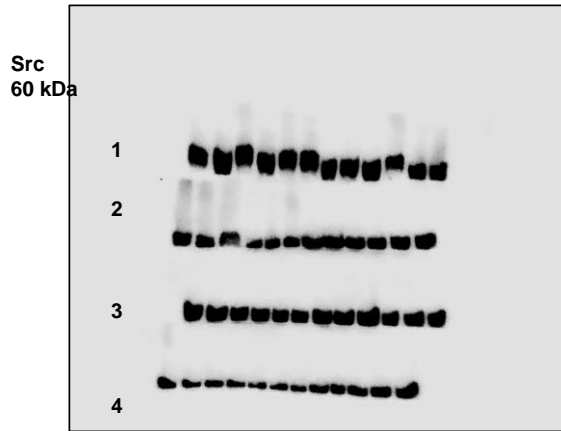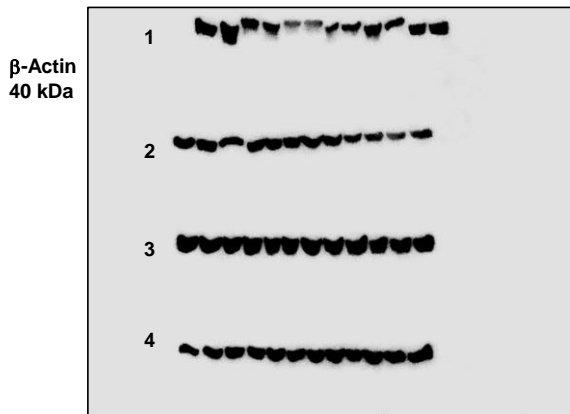

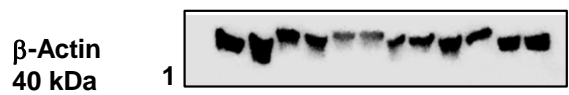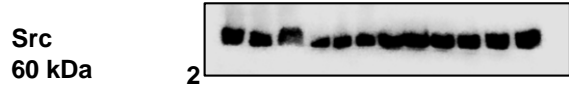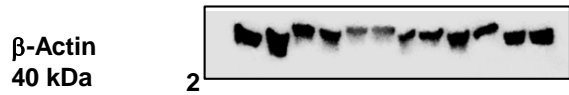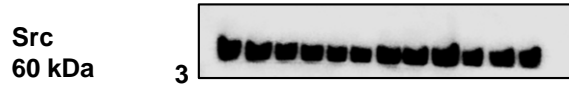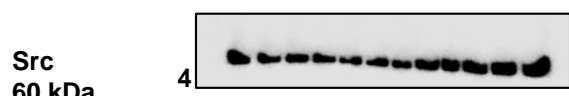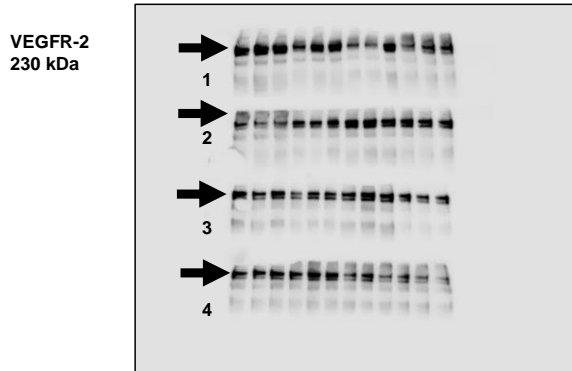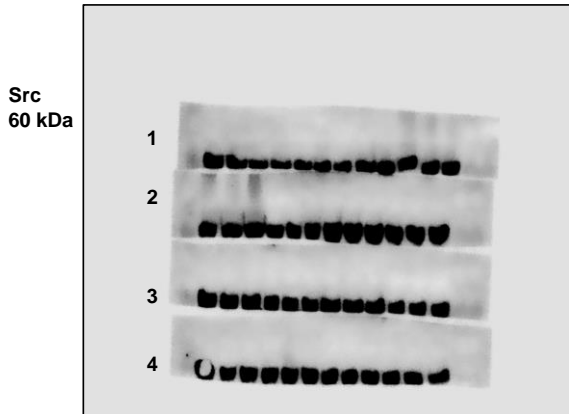

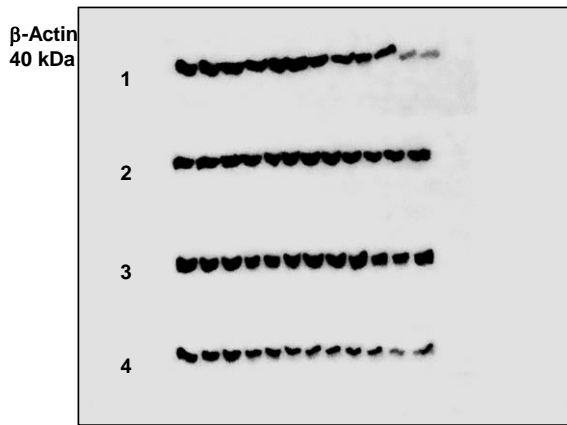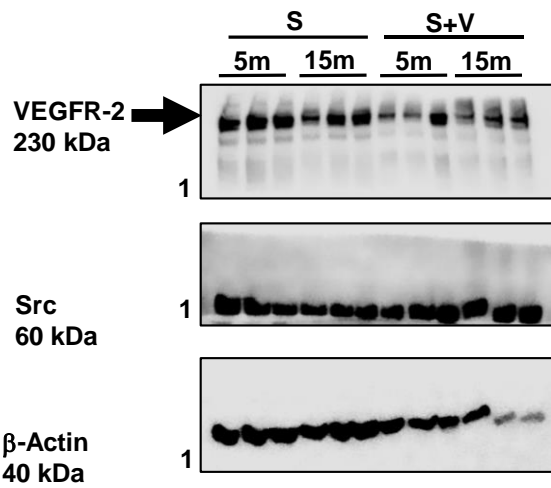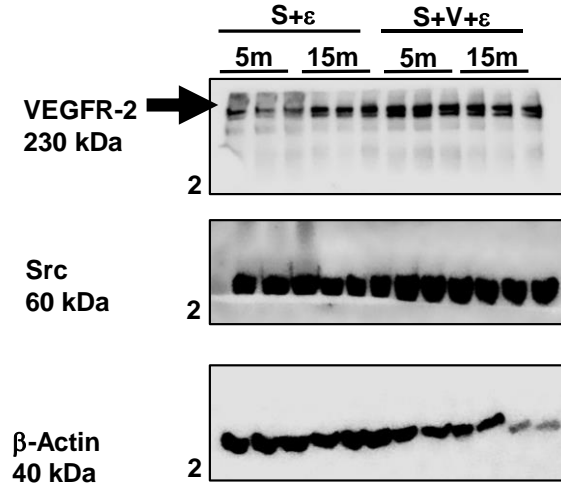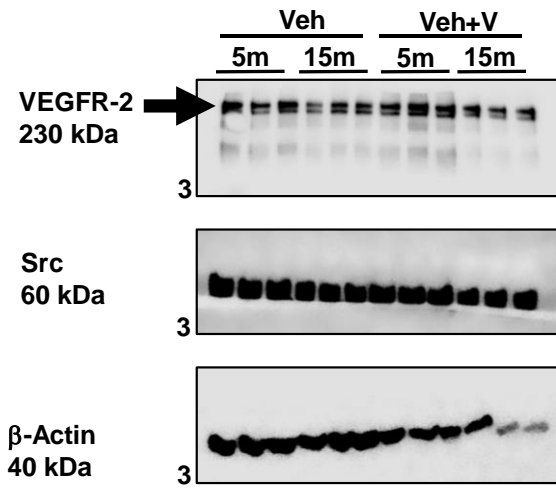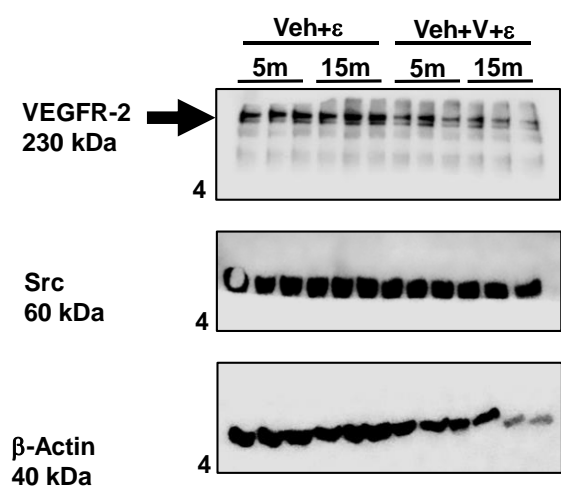

4f

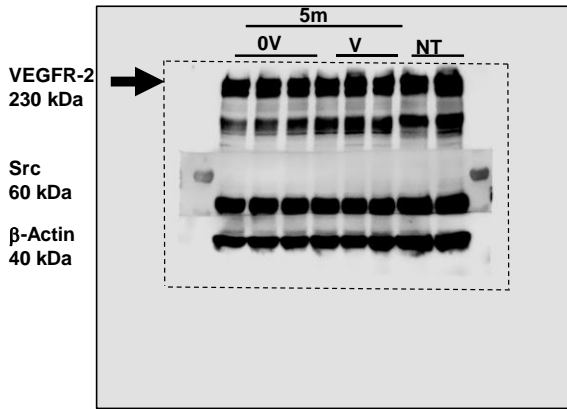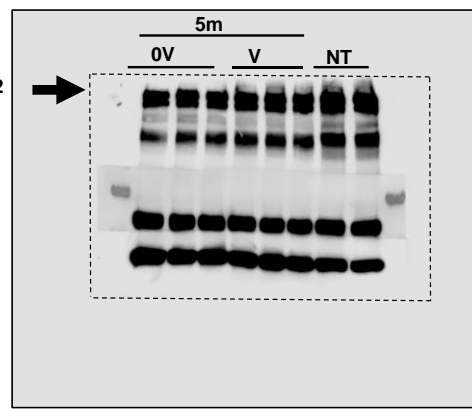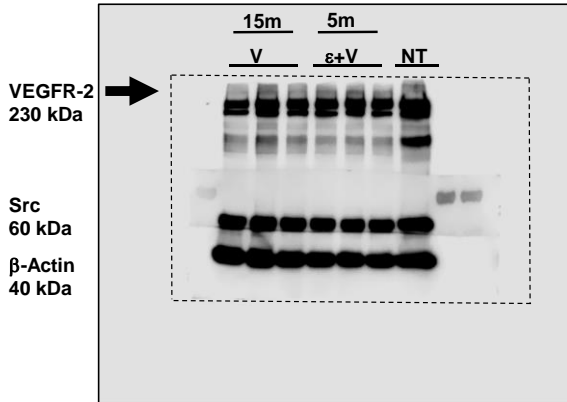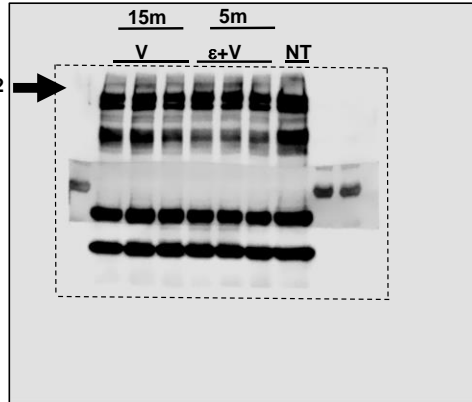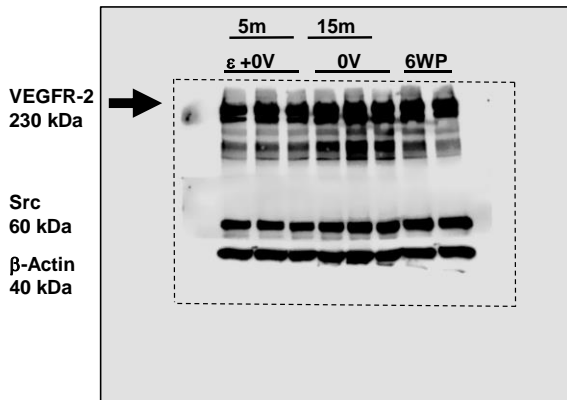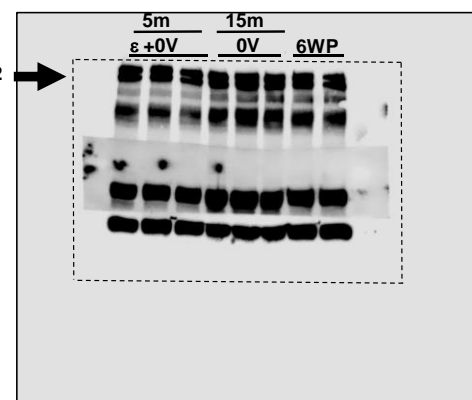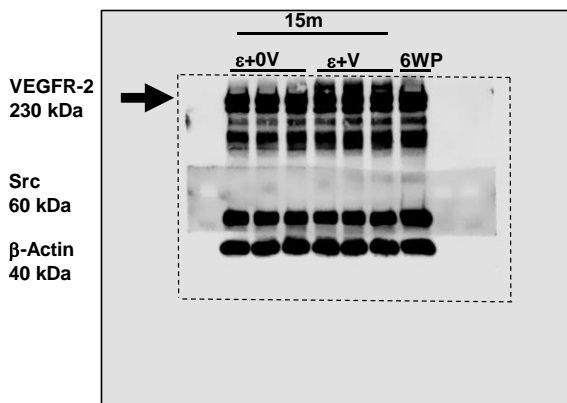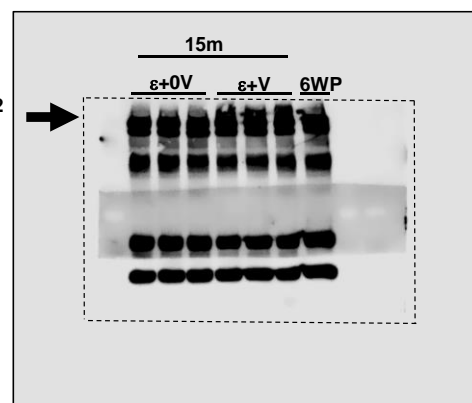



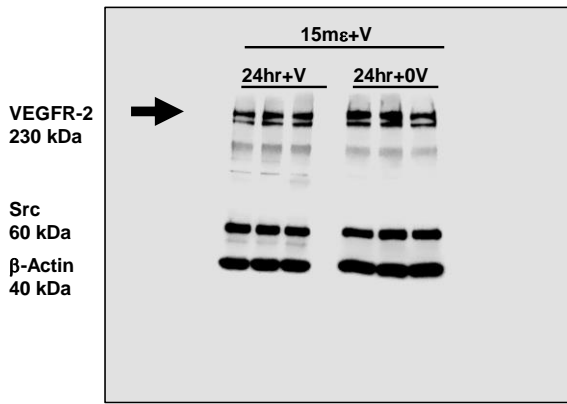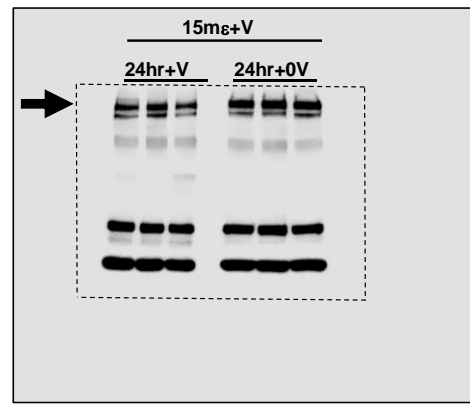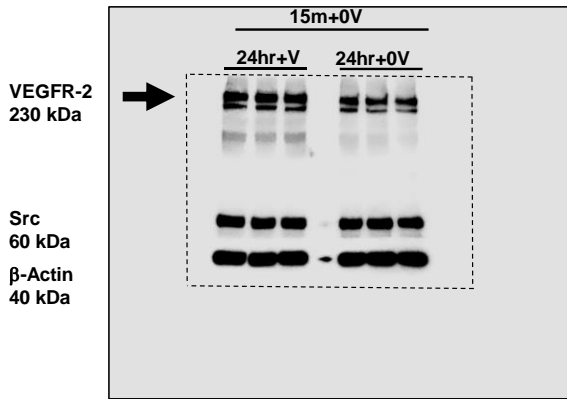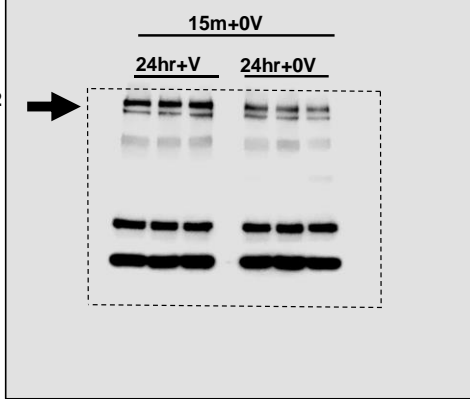

## 4g

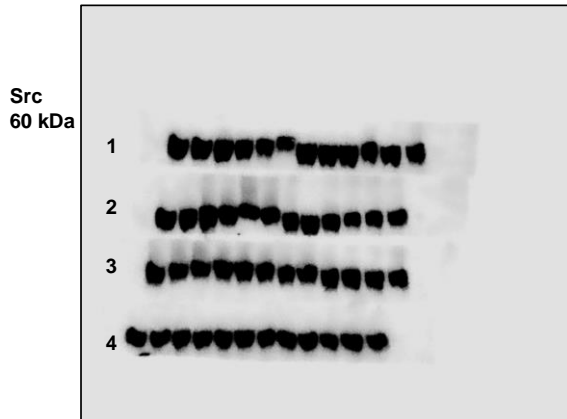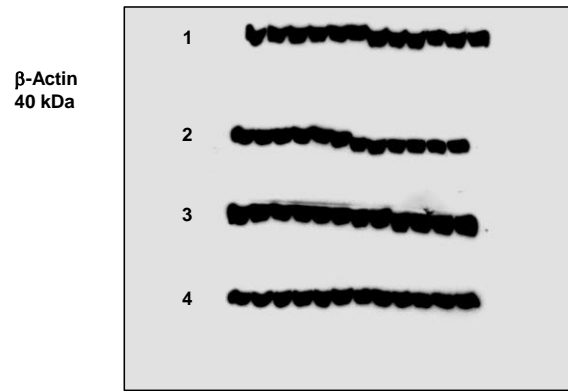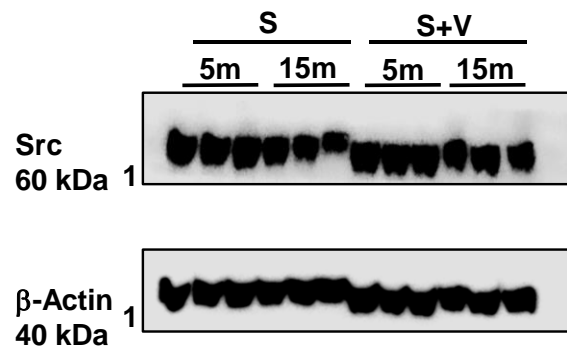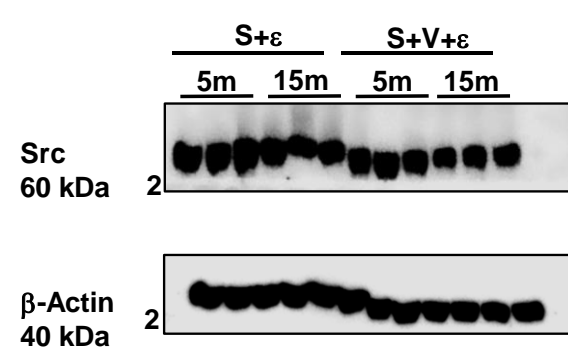

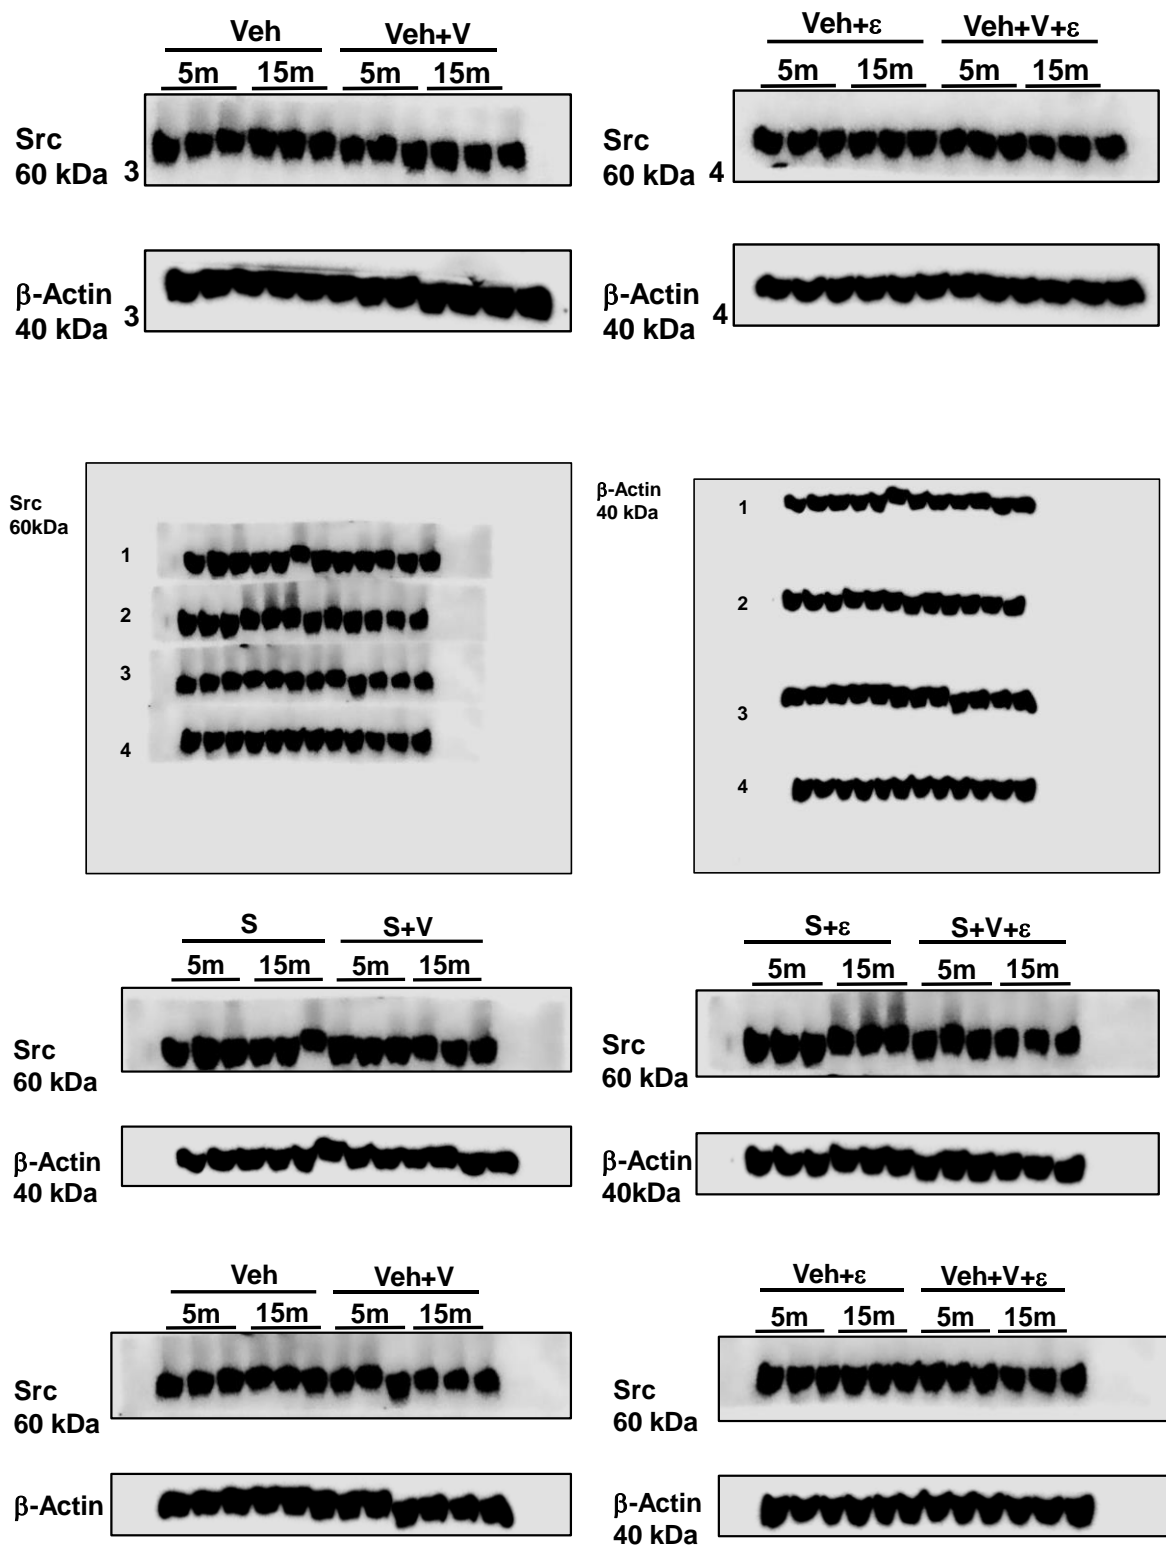

**Supplemental Fig. 4 – Labeled Western Blots for Data in Fig. 3. (a)** HMECs and **(b)** HUVECs were treated with control, no treatment (NT) media, VEGF (V), SU5416 (S), or both VEGF and SU5416 (V+S) for 72hr. Western blot analysis for total levels of Src was performed. **(c)** HUVECs in 3D fibrin gels with magnetic beads were treated with VEGF (V), DMSO as a vehicle control (Veh), or SU5416 (S) for 72hr. Some samples received no external magnetic stimulation while other samples were cultured above a rotating magnetic field. Src was analyzed via Western blot and normalized to

GAPDH as a loading control. **(d)** HMECs were subjected to control (NT) conditions without strain and VEGF, VEGF only (V), strain only ( $\epsilon$ ), or strain plus VEGF ( $\epsilon+V$ ) for 5min or 15min before Src analysis via Western blot. **(e)** HMECs were treated with combinations of strain, VEGF, SU5416, and a vehicle control for 5min or 15min. Samples were analyzed through Western Blot and stained for total Src. **(f-g)** Quantification of Western Blots for total Src in HUVECs with same treatment groups outlined above. Western Blots were normalized to  $\beta$ -actin. Arrows indicate the VEGFR-2 bands that were quantified. Full images are numbered and correspond to labelled pictures.
